# Supplementary material
Source: MDPI journal article supplement (https://www.mdpi.com/2073-4441/8/10/448)
Supplement: s1 [file s1]

## Sheet: Mediterranean-Winter Menu (Menu
	Day	Recipe	Dishes	Products	Quantity	Kilograms	Servings	Kg/person	WATER FOOTRPINT (m3*ton-1) or (l * kg-1)				Water consumed/person
									Green WF	Blue WF	Grey WF	Total WF	m3/person	Liters/person
	BREAKFAST
	MONDAY	Milk. Walnuts and anise cake. Pear.	Milk	Milk	25 cl	0.25	1	0.25	1409.72	197.519	239.173	1846.42	#REF!	461.604
			Walnuts and anise cake	Flour	375 g	0.375	4	0.09375	1410.44	48.1669	282.773	1741.39	#REF!	163.255
				Water	225 ml	0.225	4	0.05625	0	0	0	0	#REF!	0
				Yeast	15 g	0.025	4	0.00625	0	0	0	0	#REF!	0
				Sugar	10 g	0.01	4	0.0025	516.771	733.748	0	1250.52	#REF!	3.1263
				Olive oil	25 ml	0.023	4	0.00575	10592.7	2570.89	25.5307	13189.1	#REF!	75.8373
				Walnuts	100 g	0.1	4	0.025	2284.5	777.957	0	3062.46	#REF!	76.5614
				Anise	1 cg	1e-05	4	2.5e-06	7627.07	10771.6	0	18398.6	#REF!	0.0459966
			Pear	Pears	150 g	0.15	1	0.15	285.458	199.79	61.573	546.82	#REF!	82.023
	TUESDAY	Coffee with milk. Whole grains.	Coffee with milk	Coffee	10 g	0.01	1	0.01	10057.1	99.3669	432.747	10589.2	#REF!	105.892
				Water	15 cl	0.15	1	0.15	0	0	0	0	#REF!	0
				Milk	10 cl	0.1	1	0.1	1409.72	197.519	239.173	1846.42	#REF!	184.642
			Whole grains	Oat	50 g	0.05	1	0.05	1750.15	1732.39	453.893	3936.43	#REF!	196.821
				Milk	20 cl	0.2	1	0.2	1409.72	197.519	239.173	1846.42	#REF!	369.283
				Wheat	50 g	0.05	1	0.05	1553.46	53.0507	311.445	1917.95	#REF!	95.8976
	WEDNESDAY	Infusion. Serrano ham with Olive oil bocadillo.	Infusion	Water	20 cl	0.2	1	0.2	0	0	0	0	#REF!	0
				Mint	8 g	0.008	1	0.008	259.801	95.0116	0	354.813	#REF!	2.8385
			Serrano ham with Olive oil bocadillo	Bread	1/4 unit	0.0625	1	0.0625	1226.47	41.8842	245.89	1514.25	#REF!	94.6405
				Serrano ham	40 g	0.04	1	0.04	5370.76	800.393	783.999	6955.15	#REF!	278.206
				Olive oil	1 spoon	0.015	1	0.015	10592.7	2570.89	25.5307	13189.1	#REF!	197.836
	THURSDAY	Coffee with milk. Bread with strawberry jam.	Coffee with milk	Coffee	10 g	0.01	1	0.01	10057.1	99.3669	432.747	10589.2	#REF!	105.892
				Water	15 cl	0.15	1	0.15	0	0	0	0	#REF!	0
				Milk	10 cl	0.1	1	0.1	1409.72	197.519	239.173	1846.42	#REF!	184.642
			Bread with strawberry jam	Bread	2 units	0.04	1	0.04	1226.47	41.8842	245.89	1514.25	#REF!	60.5699
				Strawberries	125g	0.125	1	0.125	65.6624	110.332	33.1803	209.174	#REF!	26.1468
				Sugar	75g	0.075	1	0.075	516.771	733.748	0	1250.52	#REF!	93.7889
				Lemon	1/4 unit	0.0275	1	0.0275	222.097	158.993	54.2743	435.364	#REF!	11.9725
	FRIDAY	Milk with chocolate powder. Homemade muffins .	Milk with chocolate powder	Milk	25cl	0.25	1	0.25	1409.72	197.519	239.173	1846.42	#REF!	461.604
				Cocoa powder	8 g	0.008	1	0.008	14838.7	0	99.4097	14938.1	#REF!	119.505
			Homemade muffins	Eggs	6 units	0.39	9	0.0433333	2833.92	359.058	480.534	3673.52	#REF!	159.186
				Flour	1/4 kg	0.25	9	0.0277778	1410.44	48.1669	282.773	1741.39	#REF!	48.3718
				Sugar	1/4 kg	0.25	9	0.0277778	516.771	733.748	0	1250.52	#REF!	34.7366
				Olive oil	1/4 l	0.23	9	0.0255556	10592.7	2570.89	25.5307	13189.1	#REF!	337.055
				Orange and lemon skin	10 g	0.01	9	0.00111111	580.182	414.526	141.479	1136.19	#REF!	1.26243
	SATURDAY	Milk. Bread with olive oil, garlic and oregano. Pineapple.	Milk	Milk	25 cl	0.25	1	0.25	1409.72	197.519	239.173	1846.42	#REF!	461.604
			Bread with olive oil, garlic and oregano	Bread	2 units	0.04	1	0.04	1226.47	41.8842	245.89	1514.25	#REF!	60.5699
				Olive oil	1 spoon	0.015	1	0.015	10592.7	2570.89	25.5307	13189.1	#REF!	197.836
				Garlic	1 g	0.001	1	0.001	317.415	188.052	203.767	709.235	#REF!	0.709235
				Oregano	1 g	0.001	1	0.001	259.801	95.0116	0	354.813	#REF!	0.354813
			Pineapple	Pineapple	1/4 unit	0.5	1	0.5	67.547	5.50433	0	73.0513	#REF!	36.5257
	SUNDAY	Coffee with milk. Homemade ensaimada. Mandarins.	Coffee with milk	Coffee	10 g	0.01	1	0.01	10057.1	99.3669	432.747	10589.2	#REF!	105.892
				Water	15 cl	0.15	1	0.15	0	0	0	0	#REF!	0
				Milk	10 cl	0.1	1	0.1	1409.72	197.519	239.173	1846.42	#REF!	184.642
			Homemade ensaimada	Flour	600 g	0.6	15	0.04	1410.44	48.1669	282.773	1741.39	#REF!	69.6554
				Sugar	200 g	0.2	15	0.0133333	516.771	733.748	0	1250.52	#REF!	16.6736
				Lard	125 g	0.125	15	0.00833333	3443.2	424.358	567.794	4435.35	#REF!	36.9613
				Eggs	3 units	0.195	15	0.013	2833.92	359.058	480.534	3673.52	#REF!	47.7557
				Yeast	20 g	0.02	15	0.00133333	0	0	0	0	#REF!	0
				Water	150 ml	0.15	15	0.01	0	0	0	0	#REF!	0
			Mandarins	Mandarins	2 units	0.17	1	0.17	251.454	180.01	61.4484	492.912	#REF!	83.795
	MORNING SNACK
	MONDAY	Grapefruit with honey	Grapefruit with honey	Grapefruit	1/2 unit	0.188	1	0.188	162.566	116.408	39.7253	318.699	#REF!	59.9154
				Honey	2 spoons	0.02	1	0.02	0	0	0	0	#REF!	0
	TUESDAY	Bread with fresh cheese and olive oil. Natural lemon juice.	Bread with fresh cheese and olive oil	Bread	1/4 unit	0.0075	1	0.0075	1226.47	41.8842	245.89	1514.25	#REF!	11.3569
				Fresh cheese	65 g	0.065	1	0.065	4248.78	595.305	720.846	5564.93	#REF!	361.721
				Olive oil	1 spoon	0.015	1	0.015	10592.7	2570.89	25.5307	13189.1	#REF!	197.836
			Natural lemon juice	Water	15 cl	0.15	1	0.15	0	0	0	0	#REF!	0
				Lemon	1 unit	0.11	1	0.11	222.097	158.993	54.2743	435.364	#REF!	47.8901
	WEDNESDAY	Coffee with milk. Vegetal bocadillo.	Coffee with milk	Coffee	10 g	0.01	1	0.01	10057.1	99.3669	432.747	10589.2	#REF!	105.892
				Water	15 cl	0.15	1	0.15	0	0	0	0	#REF!	0
				Milk	10 cl	0.1	1	0.1	1409.72	197.519	239.173	1846.42	#REF!	184.642
			Vegetal bocadillo	Bread	1/3 unit	0.083	1	0.083	1226.47	41.8842	245.89	1514.25	#REF!	125.683
				Lettuce	20 g	0.02	1	0.02	47.2055	73.0526	58.5621	178.82	#REF!	3.5764
				Tuna	1 unit	0.08	1	0.08	0	0	0	0	#REF!	0
				Eggs	1 unit	0.065	1	0.065	2833.92	359.058	480.534	3673.52	#REF!	238.779
				Tomato	1 unit	0.15	1	0.15	34.6024	22.7592	25.4099	82.7716	#REF!	12.4157
				Ham	2 units	0.06	1	0.06	5981.07	891.347	873.09	7745.51	#REF!	464.731
			Mayonnaise	Olive oil	200ml	0.184	6	0.0306667	10592.7	2570.89	25.5307	13189.1	#REF!	404.466
				Egg	1unit	0.065	6	0.0108333	2833.92	359.058	480.534	3673.52	#REF!	39.7964
				Lemon	1unit	0.11	6	0.0183333	222.097	158.993	54.2743	435.364	#REF!	7.98168
	THURSDAY	Nuts	Nuts	Almonds	50 g	0.05	1	0.05	13079	1000.01	0	14079	#REF!	703.95
				Walnuts	50 g	0.05	1	0.05	2284.5	777.957	0	3062.46	#REF!	153.123
				Hazelnuts	50 g	0.05	1	0.05	12584.9	4285.68	0	16870.6	#REF!	843.53
	FRIDAY	Tuna bocadillo. Natural apple juice.	Tuna bocadillo	Bread	1/3 unit	0.083	1	0.083	1226.47	41.8842	245.89	1514.25	#REF!	125.683
				Tuna	1 unit	0.08	1	0.08	0	0	0	0	#REF!	0
			Natural apple juice	Apple juice	250 ml	0.25	1	0.25	279.705	195.764	60.3323	535.802	#REF!	133.95
	SATURDAY	Mussels.	Mussels	Mussels	70 g	0.07	1	0.07	0	0	0	0	#REF!	0
	SUNDAY	Fresh cheese with pepper and olive oil tacos	Fresh cheese with pepper and olive oil tacos	Bread	1/3 unit	0.083	1	0.083	1226.47	41.8842	245.89	1514.25	#REF!	125.683
				Fresh cheese	150 g	0.15	1	0.15	4248.78	595.305	720.846	5564.93	#REF!	834.74
				Pepper	1 spoon	0.005	1	0.005	6759.63	291.794	666.723	7718.15	#REF!	38.5908
				Olive oil	1 spoon	0.015	1	0.015	10592.7	2570.89	25.5307	13189.1	#REF!	197.836
	LUNCH
	MONDAY	Cauliflower with vinaigrette dressing. Stew rabbit with white wine and onions.Orange	Cauliflower with vinaigrette dressing	Cauliflower	1/2 unit	0.75	1	0.75	73.7717	104.056	82.9502	260.778	#REF!	195.583
				Tomato	1 unit	0.15	1	0.15	34.6024	22.7592	25.4099	82.7716	#REF!	12.4157
				Green pepper	1 unit	0.2	1	0.2	38.7774	2.64643	36.7628	78.1866	#REF!	15.6373
				Red pepper	1/2 unit	0.11	1	0.11	38.7774	2.64643	36.7628	78.1866	#REF!	8.60053
				Onion	1 unit	0.15	1	0.15	76.5967	114.99	91.7774	283.364	#REF!	42.5045
				Vinegar	50 ml	0.0505	1	0.0505	866.509	155.777	248.62	1270.91	#REF!	64.1807
				Olive oil	200 ml	0.184	1	0.184	10592.7	2570.89	25.5307	13189.1	#REF!	2426.79
				Pepper	1 spoon	0.005	1	0.005	6759.63	291.794	666.723	7718.15	#REF!	38.5908
			Stew rabbit with white wine and onions	Rabbit	1,8 kg	1.8	7	0.257143	2685.7	320.999	442.879	3449.58	#REF!	887.034
				Tomato	4 units	0.6	7	0.0857143	34.6024	22.7592	25.4099	82.7716	#REF!	7.09471
				Carrots	3 units	0.24	7	0.0342857	56.3364	90.6329	34.9761	181.945	#REF!	6.23813
				White wine	50 cl	0.445	7	0.0635714	866.509	155.777	248.62	1270.91	#REF!	80.7933
				Olive oil	6 spoons	0.09	7	0.0128571	10592.7	2570.89	25.5307	13189.1	#REF!	169.574
				Onion	4 units	0.6	7	0.0857143	76.5967	114.99	91.7774	283.364	#REF!	24.2883
			Orange	Orange	1 unit	0.225	1	0.225	223.165	159.756	54.5352	437.456	#REF!	98.4276
	TUESDAY	Roasted chikory heads. Grilled chicken breast with potato sauce. Banana.	Roasted chikory heads	Chicory heads	2 units	0.3	1	0.3	47.2055	73.0526	58.5621	178.82	#REF!	53.6461
				Pepper	1 spoon	0.005	1	0.005	6759.63	291.794	666.723	7718.15	#REF!	38.5908
				Vinegar	2 spoons	0.014	1	0.014	866.509	155.777	248.62	1270.91	#REF!	17.7927
				Rosemary	1 spoon	0.005	1	0.005	259.801	95.0116	0	354.813	#REF!	1.77406
			Grilled chicken breast with potato sauce	Chicken	4 units	0.6	4	0.15	2685.7	320.999	442.879	3449.58	#REF!	517.437
				Leek	1 unit	0.075	4	0.01875	76.5967	114.99	91.7774	283.364	#REF!	5.31307
				Onion	1 unit	0.15	4	0.0375	76.5967	114.99	91.7774	283.364	#REF!	10.6261
				Potatoes	5 units	0.875	4	0.21875	89.5155	76.8336	47.4466	213.796	#REF!	46.7678
				Olive oil	2 spoons	0.03	4	0.0075	10592.7	2570.89	25.5307	13189.1	#REF!	98.9182
			Banana	Banana	1 unit	0.16	1	0.16	110.472	133.204	26.0512	269.728	#REF!	43.1565
	WEDNESDAY	Pisto. Stewed beef with pilaf rice.Mandarins.	Pisto	Red pepper	2 units	0.44	4	0.11	38.7774	2.64643	36.7628	78.1866	#REF!	8.60053
				Tomato	2 units	0.3	4	0.075	34.6024	22.7592	25.4099	82.7716	#REF!	6.20787
				Eggplant	2 units	0.54	4	0.135	49.65	109.183	39.283	198.116	#REF!	26.7457
				Garlic	4 cloves	0.02	4	0.005	317.415	188.052	203.767	709.235	#REF!	3.54617
				Eggs	4 units	0.26	4	0.065	2833.92	359.058	480.534	3673.52	#REF!	238.779
				Olive oil	4 cl	0.037	4	0.00925	10592.7	2570.89	25.5307	13189.1	#REF!	121.999
				Sweet paprika	1 spoon	0.005	4	0.00125	6759.63	291.794	666.723	7718.15	#REF!	9.64769
			Stewed beef with pilaf rice	Beef	800 g	0.8	4	0.2	11426.1	1008.19	1173.86	13608.1	#REF!	2721.63
				Onion	50 g	0.05	4	0.0125	76.5967	114.99	91.7774	283.364	#REF!	3.54205
				Cider	25 cl	0.16	4	0.04	1064.57	191.383	305.447	1561.4	#REF!	62.4559
				Carrots	100 g	0.1	4	0.025	56.3364	90.6329	34.9761	181.945	#REF!	4.54863
				Peas	100 g	0.1	4	0.025	253.379	307.283	241.219	801.881	#REF!	20.047
				Olive oil	50 ml	0.046	4	0.0115	10592.7	2570.89	25.5307	13189.1	#REF!	151.675
				Rice	100 g	0.1	4	0.025	493.963	1739.43	0	2233.4	#REF!	55.8349
				Garlic	1 clove	0.005	4	0.00125	317.415	188.052	203.767	709.235	#REF!	0.886543
				Parsley	1 spoon	0.005	4	0.00125	7627.07	10771.6	0	18398.6	#REF!	22.9983
			Mandarins	Mandarins	3 units	0.255	1	0.255	251.454	180.01	61.4484	492.912	#REF!	125.693
	THURSDAY	Stewed lentils. Cod salad with olives and oranges. Yoghurt with kiwi.	Stewed lentils	Lentils	250 g	0.25	4	0.0625	4258.33	439.395	0	4697.72	#REF!	293.608
				Onion	1 unit	0.15	4	0.0375	76.5967	114.99	91.7774	283.364	#REF!	10.6261
				Red pepper	1 unit	0.22	4	0.055	38.7774	2.64643	36.7628	78.1866	#REF!	4.30026
				Tomato	1 unit	0.15	4	0.0375	34.6024	22.7592	25.4099	82.7716	#REF!	3.10393
				Garlic	2 cloves	0.01	4	0.0025	317.415	188.052	203.767	709.235	#REF!	1.77309
				Carrots	1 unit	0.08	4	0.02	56.3364	90.6329	34.9761	181.945	#REF!	3.63891
				Laurel	1 hoja	0.00025	4	6.25e-05	0	0	0	0	#REF!	0
				Sweet paprika	1 spoon	0.005	4	0.00125	6759.63	291.794	666.723	7718.15	#REF!	9.64769
				Chorizo	130 g	0.13	4	0.0325	5665.05	843.971	826.958	7335.98	#REF!	238.419
				Pepper	1 spoon	0.005	4	0.00125	6759.63	291.794	666.723	7718.15	#REF!	9.64769
				Olive oil	2 spoons	0.03	4	0.0075	10592.7	2570.89	25.5307	13189.1	#REF!	98.9182
			Cod salad with olives and oranges	Cod	500 g	0.5	4	0.125	0	0	0	0	#REF!	0
				Oranges	3 units	0.675	4	0.16875	223.165	159.756	54.5352	437.456	#REF!	73.8207
				Onion	1/2 unit	0.075	4	0.01875	76.5967	114.99	91.7774	283.364	#REF!	5.31307
				Olives	100 g	0.1	4	0.025	2212.77	537.047	5.33326	2755.15	#REF!	68.8787
				Eggs	4 units	0.26	4	0.065	2833.92	359.058	480.534	3673.52	#REF!	238.779
				Olive oil	75 ml	0.069	4	0.01725	10592.7	2570.89	25.5307	13189.1	#REF!	227.512
			Yoghurt with kiwi	Yoghurt	1 unit	0.125	1	0.125	1585.94	222.209	269.07	2077.22	#REF!	259.652
				Kiwi	1 unit	0.1	1	0.1	349.114	170.206	89.7541	609.074	#REF!	60.9074
	FRIDAY	Tomato and basil soup. Broad beans with morcilla. Custard	Tomato and basil soup	Tomato	8 units	1.2	2	0.6	34.6024	22.7592	25.4099	82.7716	#REF!	49.6629
				Potatoes	2 units	0.35	2	0.175	89.5155	76.8336	47.4466	213.796	#REF!	37.4142
				Basil	4 leaves	0.001	2	0.0005	259.801	95.0116	0	354.813	#REF!	0.177406
				Cream	10 cl	0.08	2	0.04	2537.5	355.535	430.512	3323.55	#REF!	132.942
				Pepper	1 spoon	0.005	2	0.0025	6759.63	291.794	666.723	7718.15	#REF!	19.2954
				Olive oil	1 spoon	0.015	2	0.0075	10592.7	2570.89	25.5307	13189.1	#REF!	98.9182
			Broad beans with morcilla	Broad beans	500 g	0.5	2	0.25	1754.87	144.288	0	1899.16	#REF!	474.79
				Morcilla	200 g	0.2	2	0.1	1233.33	179.356	180.036	1592.72	#REF!	159.272
				Olive oil	2 spoons	0.03	2	0.015	10592.7	2570.89	25.5307	13189.1	#REF!	197.836
			Custard	Egg yolks	4 units	0.26	3	0.0866667	2833.92	364.058	480.534	3678.52	#REF!	318.805
				Cinnamon	1 unit	0.01	3	0.00333333	11986.7	0	740.35	12727.1	#REF!	42.4236
				Cinnamon powder	10 mg	1e-05	3	3.33333e-06	11986.7	0	740.35	12727.1	#REF!	0.0424236
				Lemon skin	1 unit	0.11	3	0.0366667	580.182	414.526	141.479	1136.19	#REF!	41.6602
				Milk	500 ml	0.5	3	0.166667	1409.72	197.519	239.173	1846.42	#REF!	307.736
				Sugar	175 g	0.175	3	0.0583333	516.771	733.748	0	1250.52	#REF!	72.9469
				Maize flour	5 mg	5e-06	3	1.66667e-06	353.789	415.973	167.838	937.6	#REF!	0.00156267
	SATURDAY	Macarrons with tomato sauce. Pork loin with mustard and carrots. Candied oranges.	Macarrons with tomato sauce	Macarrons	400g	0.4	4	0.1	1410.44	48.1669	282.773	1741.39	#REF!	174.139
				Cheese	100g	0.1	4	0.025	6744.09	960.802	1144.2	8849.1	#REF!	221.227
				Tomato	800 g	0.8	4	0.2	34.6024	22.7592	25.4099	82.7716	#REF!	16.5543
				Onion	1 unit	0.15	4	0.0375	76.5967	114.99	91.7774	283.364	#REF!	10.6261
			Pork loin with mustard and carrots	Pork loin	8 units	0.4	4	0.1	5551.75	822.091	810.419	7184.26	#REF!	718.426
				Potatoes	4 units	0.7	4	0.175	89.5155	76.8336	47.4466	213.796	#REF!	37.4142
				Carrots	1 kg	1	4	0.25	56.3364	90.6329	34.9761	181.945	#REF!	45.4863
				Onion	2 units	0.3	4	0.075	76.5967	114.99	91.7774	283.364	#REF!	21.2523
			Mustard	Mustard	150g	0.15	10	0.015	1996.28	0	571.985	2568.27	#REF!	38.524
				Vinegar	100g	0.1	10	0.01	866.509	155.777	248.62	1270.91	#REF!	12.7091
				Honey	1 spoon	0.01	10	0.001	0	0	0	0	#REF!	0
			Candied oranges	Oranges	2 units	0.45	2	0.225	223.165	159.756	54.5352	437.456	#REF!	98.4276
				Sugar	300 g	0.3	2	0.15	516.771	733.748	0	1250.52	#REF!	187.578
	SUNDAY	Grilled leeks with romesco sauce. Grilled megrim with roasted potatoes. Apple pie.	Grilled leeks with romesco sauce	Leeks	6 units	0.45	1	0.45	76.5967	114.99	91.7774	283.364	#REF!	127.514
				Almonds	12 units	0.042	1	0.042	13079	1000.01	0	14079	#REF!	591.318
				Hazelnuts	12 units	0.042	1	0.042	12584.9	4285.68	0	16870.6	#REF!	708.565
				Garlic	1 clove	0.005	1	0.005	317.415	188.052	203.767	709.235	#REF!	3.54617
				Red pepper	3 units	0.66	1	0.66	38.7774	2.64643	36.7628	78.1866	#REF!	51.6032
				Tomato	2 units	0.3	1	0.3	34.6024	22.7592	25.4099	82.7716	#REF!	24.8315
				Olive oil	2 spoons	0.03	1	0.03	10592.7	2570.89	25.5307	13189.1	#REF!	395.673
			Grilled megrim with roasted potatoes	Megrim	800 g	0.8	4		0	0	0	0	#REF!	0
				Potatoes	3 units	0.525	4	0.13125	89.5155	76.8336	47.4466	213.796	#REF!	28.0607
				White wine	75 ml	0.067	4	0.01675	866.509	155.777	248.62	1270.91	#REF!	21.2877
				Olive oil	80 ml	0.074	4	0.0185	10592.7	2570.89	25.5307	13189.1	#REF!	243.998
				Tomato	300 g	0.3	4	0.075	34.6024	22.7592	25.4099	82.7716	#REF!	6.20787
				Onion	1 unit	0.15	4	0.0375	76.5967	114.99	91.7774	283.364	#REF!	10.6261
				Eggplant	1 unit	0.27	4	0.0675	49.65	109.183	39.283	198.116	#REF!	13.3728
			Apple pie	Sugar	250 g	0.25	2	0.125	516.771	733.748	0	1250.52	#REF!	156.315
				Flour	250 g	0.25	2	0.125	1410.44	48.1669	282.773	1741.39	#REF!	217.673
				Apple	1 kg	1	2	0.5	279.705	195.764	60.3323	535.802	#REF!	267.901
				Yeast	1 sachet	0.016	2	0.008	0	0	0	0	#REF!	0
				Eggs	2 units	0.13	2	0.065	2833.92	359.058	480.534	3673.52	#REF!	238.779
			Peach jam	Peach	125g	0.125	1	0.125	341.667	223.729	75.8052	641.201	#REF!	80.1502
				Sugar	75g	0.075	1	0.075	516.771	733.748	0	1250.52	#REF!	93.7889
				Lemon	1/4 unit	0.0275	1	0.0275	222.097	158.993	54.2743	435.364	#REF!	11.9725
	DINNER
	MONDAY	Endives, carrots and feta cheese salad. Eggplant omelette with bread with tomato. Fruits yoghurt.	Endives, carrots and feta cheese salad	Carrots	4 units	0.32	4	0.08	56.3364	90.6329	34.9761	181.945	#REF!	14.5556
				Feta cheese	100 g	0.1	4	0.025	6744.09	960.802	1144.2	8849.1	#REF!	221.227
				Endives	200 g	0.2	4	0.05	47.2055	73.0526	58.5621	178.82	#REF!	8.94101
				Olives	16 units	0.064	4	0.016	2212.77	537.047	5.33326	2755.15	#REF!	44.0824
				Cherry tomatoes	16 units	0.24	4	0.06	34.6024	22.7592	25.4099	82.7716	#REF!	4.96629
				Olive oil	1 dl	0.092	4	0.023	10592.7	2570.89	25.5307	13189.1	#REF!	303.349
			Eggplant omelette with bread with tomato	Eggs	5 units	0.325	4	0.08125	2833.92	359.058	480.534	3673.52	#REF!	298.473
				Eggplant	1 unit	0.27	4	0.0675	49.65	109.183	39.283	198.116	#REF!	13.3728
				Onion	1 unit	0.15	4	0.0375	76.5967	114.99	91.7774	283.364	#REF!	10.6261
				Bread	1/3 unit	0.083	1	0.083	1226.47	41.8842	245.89	1514.25	#REF!	125.683
				Tomato	1 unit	0.15	1	0.15	34.6024	22.7592	25.4099	82.7716	#REF!	12.4157
			Fruits yoghurt	Yoghurt	1 unit	0.125	1	0.125	1585.94	222.209	269.07	2077.22	#REF!	259.652
	TUESDAY	Boiled broccoli with garlics. Squids. Pearsauce.	Boiled broccoli with garlics	Broccoli	1200 g	1.2	4	0.3	73.7717	104.056	82.9502	260.778	#REF!	78.2334
				Olive oil	1/2 dl	0.046	4	0.0115	10592.7	2570.89	25.5307	13189.1	#REF!	151.675
				Garlic	2 cloves	0.01	4	0.0025	317.415	188.052	203.767	709.235	#REF!	1.77309
			Squids	Squids	1 kg	1	6	0.166667	0	0	0	0	#REF!	0
				Olive oil	120 ml	0.11	6	0.0183333	10592.7	2570.89	25.5307	13189.1	#REF!	241.8
				Garlic	4 cloves	0.02	6	0.00333333	317.415	188.052	203.767	709.235	#REF!	2.36412
			Pearsauce	Pears	2 units	0.38	2	0.19	285.458	199.79	61.573	546.82	#REF!	103.896
				Sugar	2 spoons	0.04	2	0.02	516.771	733.748	0	1250.52	#REF!	25.0104
				Water	75 cl	0.75	2	0.375	0	0	0	0	#REF!	0
				Lemon juice	1 spoon	0.015	2	0.0075	222.097	158.993	54.2743	435.364	#REF!	3.26523
				Cinnamon	10 mg	1e-05	2	5e-06	11986.7	0	740.35	12727.1	#REF!	0.0636354
				Anise	10 g	0.01	2	0.005	7627.07	10771.6	0	18398.6	#REF!	91.9931
	WEDNESDAY	Artichokes skipped with Serrano ham. Gratin stuffed eggs with tuna. Apple.	Artichokes skipped with Serrano ham	Artichokes	1 kg	1	4	0.25	307.75	154.217	109.62	571.587	#REF!	142.897
				Garlic	5 cloves	0.025	4	0.00625	317.415	188.052	203.767	709.235	#REF!	4.43272
				Serrano ham	150 g	0.15	4	0.0375	5370.76	800.393	783.999	6955.15	#REF!	260.818
				Olive oil	120 ml	0.11	4	0.0275	10592.7	2570.89	25.5307	13189.1	#REF!	362.7
			Gratin stuffed eggs with tuna	Egg	4 units	0.26	2	0.13	2833.92	359.058	480.534	3673.52	#REF!	477.557
				Tuna	2 units	0.16	2	0.08	0	0	0	0	#REF!	0
				Onion	1/4 unit	0.0375	2	0.01875	76.5967	114.99	91.7774	283.364	#REF!	5.31307
				Tomato	2 spoons	0.03	2	0.015	34.6024	22.7592	25.4099	82.7716	#REF!	1.24157
				Milk	15 cl	0.15	2	0.075	1409.72	197.519	239.173	1846.42	#REF!	138.481
				Flour	30 g	0.03	2	0.015	1410.44	48.1669	282.773	1741.39	#REF!	26.1208
				Butter	30 g	0.03	2	0.015	7424.59	1040.27	1259.65	9724.52	#REF!	145.868
				Cheese	100 g	0.1	2	0.05	6744.09	960.802	1144.2	8849.1	#REF!	442.455
			Apple	Apple	1 unit	0.2	1	0.2	279.705	195.764	60.3323	535.802	#REF!	107.16
	THURSDAY	Gazpachuelo. Cabbage with minced chicken and vegetables. Curd.	Gazpachuelo	Potatoes	2 units	0.35	2	0.175	89.5155	76.8336	47.4466	213.796	#REF!	37.4142
				Garlic	2 cloves	0.01	2	0.005	317.415	188.052	203.767	709.235	#REF!	3.54617
				Shrimps	150 g	0.15	2	0.075	0	0	0	0	#REF!	0
				Hake	150 g	0.15	2	0.075	0	0	0	0	#REF!	0
				Lemon	1 unit	0.11	2	0.055	222.097	158.993	54.2743	435.364	#REF!	23.945
				Egg	1 unit	0.065	2	0.0325	2833.92	359.058	480.534	3673.52	#REF!	119.389
				Olive oil	150 ml	0.138	2	0.069	10592.7	2570.89	25.5307	13189.1	#REF!	910.048
			Cabbage with minced chicken and vegetables	Cabbage	100 g	0.1	2	0.05	80.9564	87.6046	53.1427	221.704	#REF!	11.0852
				Cheese	75 g	0.075	2	0.0375	6744.09	960.802	1144.2	8849.1	#REF!	331.841
				Chicken	250 g	0.25	2	0.125	2685.7	320.999	442.879	3449.58	#REF!	431.197
				Tomato	1 spoon	0.015	2	0.0075	34.6024	22.7592	25.4099	82.7716	#REF!	0.620787
				Green pepper	1 unit	0.2	2	0.1	38.7774	2.64643	36.7628	78.1866	#REF!	7.81866
				Onion	1/2 unit	0.075	2	0.0375	76.5967	114.99	91.7774	283.364	#REF!	10.6261
				Garlic	4 cloves	0.02	2	0.01	317.415	188.052	203.767	709.235	#REF!	7.09235
			Curd	Milk	1 l	1	4	0.25	1409.72	197.519	239.173	1846.42	#REF!	461.604
				Rennet	1 spoon	0.02	4	0.005	4248.78	595.305	720.846	5564.93	#REF!	27.8247
				Honey	4 spoon	0.04	4	0.01	0	0	0	0	#REF!	0
	FRIDAY	Thistles with almonds and pine nuts. Trout with tomatos. Mandarins.	Thistles with almonds and pine nuts	Thistles	1,5 kg	1.5	4	0.375	47.2055	73.0526	58.5621	178.82	#REF!	67.0576
				Almonds	100 g	0.1	4	0.025	13079	1000.01	0	14079	#REF!	351.975
				Olive oil	150 ml	0.138	4	0.0345	10592.7	2570.89	25.5307	13189.1	#REF!	455.024
				Garlic	6 cloves	0.03	4	0.0075	317.415	188.052	203.767	709.235	#REF!	5.31926
				Flour	20 mg	2e-05	4	5e-06	1410.44	48.1669	282.773	1741.39	#REF!	0.00870693
			Trout with tomatos	Trout	1 unit	0.2	2	0.1	0	0	0	0	#REF!	0
				Onion	1 unit	0.15	2	0.075	76.5967	114.99	91.7774	283.364	#REF!	21.2523
				Tomatoes	4 units	0.6	2	0.3	34.6024	22.7592	25.4099	82.7716	#REF!	24.8315
				Garlic	2 cloves	0.01	2	0.005	317.415	188.052	203.767	709.235	#REF!	3.54617
				Bread	50 g	0.05	2	0.025	1226.47	41.8842	245.89	1514.25	#REF!	37.8562
				Olive oil	50 ml	0.046	2	0.023	10592.7	2570.89	25.5307	13189.1	#REF!	303.349
			Mandarins	Mandarins	3 units	0.255	4	0.06375	251.454	180.01	61.4484	492.912	#REF!	31.4231
	SATURDAY	Spinachs with cream and eggs. Yoghurt with walnuts	Spinachs with cream and eggs	Spinach	400 g	0.4	4	0.1	70.5155	114.363	88.4911	273.37	#REF!	27.337
				Milk	1/2 l	0.5	4	0.125	1409.72	197.519	239.173	1846.42	#REF!	230.802
				Butter	200 g	0.2	4	0.05	7424.59	1040.27	1259.65	9724.52	#REF!	486.226
				Eggs	4 units	0.26	4	0.065	2833.92	359.058	480.534	3673.52	#REF!	238.779
				Flour	200 g	0.2	4	0.05	1410.44	48.1669	282.773	1741.39	#REF!	87.0693
			Yoghurt with walnuts	Yoghurt	1 unit	0.125	1	0.125	1585.94	222.209	269.07	2077.22	#REF!	259.652
				Walnuts	20 g	0.02	1	0.02	2284.5	777.957	0	3062.46	#REF!	61.2491
	SUNDAY	Carrot's cream. Cheese-patties with cabbage salad. Apple.	Carrot's cream	Carrots	3 units	0.24	4	0.06	56.3364	90.6329	34.9761	181.945	#REF!	10.9167
				Potatoes	1 unit	0.175	4	0.04375	89.5155	76.8336	47.4466	213.796	#REF!	9.35356
				Onion	1/4 unit	0.0375	4	0.009375	76.5967	114.99	91.7774	283.364	#REF!	2.65653
				Water	50 cl	0.5	4	0.125	0	0	0	0	#REF!	0
				Cream	5 spoons	0.075	4	0.01875	2537.5	355.535	430.512	3323.55	#REF!	62.3165
			Cheese-patties with cabbage salad	Flour de Wheat	1/2 kg	0.5	4	0.125	1410.44	48.1669	282.773	1741.39	#REF!	217.673
				Milk	6 spoons	0.09	4	0.0225	1409.72	197.519	239.173	1846.42	#REF!	41.5443
				Egg	4 units	0.26	4	0.065	2833.92	359.058	480.534	3673.52	#REF!	238.779
				Cheese	200 g	0.2	4	0.05	6744.09	960.802	1144.2	8849.1	#REF!	442.455
				Onion	2 units	0.3	4	0.075	76.5967	114.99	91.7774	283.364	#REF!	21.2523
				Lard	50 g	0.05	4	0.0125	3443.2	424.358	567.794	4435.35	#REF!	55.4419
				Sugar	1/2 spoon	0.01	4	0.0025	516.771	733.748	0	1250.52	#REF!	3.1263
				Olive oil	3 spoons	0.045	4	0.01125	10592.7	2570.89	25.5307	13189.1	#REF!	148.377
				Cabbage	200 g	0.2	4	0.05	80.9564	87.6046	53.1427	221.704	#REF!	11.0852
			Apple	Apple	1 unit	0.2	1	0.2	279.705	195.764	60.3323	535.802	#REF!	107.16
