# Supplementary material
Source: MDPI journal article supplement (https://www.mdpi.com/2073-4441/8/10/448)
Supplement: s2 [file s2]

## Sheet: Mediterranean-Summer menu (Menu
	Day	Recipe	Dishes	Products	Quantity	Kilograms	Servings	Kg/person	WATER FOOTRPINT (m3*ton-1) or (l * kg-1)				Water consumed/person
									Green WF	Blue WF	Grey WF	Total WF	m3/person	Liters/person
	BREAKFAST
	MONDAY	Coffee with milk. Pancakes with peaches and honey.	Coffee with milk	Coffee	10 g	0.01	1	0.01	10057.1	99.3669	432.747	10589.2	#REF!	105.892
				Water	15 cl	0.15	1	0.15	0	0	0	0	#REF!	0
				Milk	10 cl	0.1	1	0.1	1409.72	197.519	239.173	1846.42	#REF!	184.642
			Pancakes with peaches and honey	Flour	25cl	0.162	2	0.081	1410.44	48.1669	282.773	1741.39	#REF!	141.052
				Yeast	1 sachet	0.016	2	0.008	0	0	0	0	#REF!	0
				Milk	25 cl	0.25	2	0.125	1409.72	197.519	239.173	1846.42	#REF!	230.802
				Sugar	2 spoons	0.04	2	0.02	516.771	733.748	0	1250.52	#REF!	25.0104
				Egg	1 unit	0.065	2	0.0325	2833.92	359.058	480.534	3673.52	#REF!	119.389
				Olive oil	1 spoon	0.015	2	0.0075	10592.7	2570.89	25.5307	13189.1	#REF!	98.9182
				Peaches	1 unit	0.2	1	0.2	341.667	223.729	75.8052	641.201	#REF!	128.24
				Honey	10 ml	0.014	1	0.014	0	0	0	0	#REF!	0
	TUESDAY	Orange and lemon juice. Yoghurt and nuts	Orange and lemon juice	Orange	1 unit	0.225	1	0.225	223.165	159.756	54.5352	437.456	#REF!	98.4276
				Lemon	1 unit	0.11	1	0.11	222.097	158.993	54.2743	435.364	#REF!	47.8901
			Yoghurt and nuts	Yoghurt	1 unit	0.125	2	0.0625	1585.94	222.209	269.07	2077.22	#REF!	129.826
				Oat	2 spoons	0.02	2	0.01	1750.15	1732.39	453.893	3936.43	#REF!	39.3643
				Almonds	2 spoons	0.036	2	0.018	13079	1000.01	0	14079	#REF!	253.422
				Pumpkin seeds	2 spoons	0.05	2	0.025	50.4066	32.8426	38.3574	121.607	#REF!	3.04017
				Honey	2 spoons	0.02	2	0.01	0	0	0	0	#REF!	0
	WEDNESDAY	Bread with goat cheese, onion and olive oil	Bread with goat cheese, onion and olive oil	Bread	1/3 unit	0.083	1	0.083	1226.47	41.8842	245.89	1514.25	#REF!	125.683
				Goat cheese	100 g	0.1	1	0.1	6744.09	960.802	1144.2	8849.1	#REF!	884.91
				Olive oil	1 spoon	0.015	1	0.015	10592.7	2570.89	25.5307	13189.1	#REF!	197.836
				Onion	1 unit	0.1	1	0.1	76.5967	114.99	91.7774	283.364	#REF!	28.3364
	THURSDAY	Yoghurt with cereals	Yoghurt	Yoghurt	1 unit	0.125	1	0.125	1585.94	222.209	269.07	2077.22	#REF!	259.652
			Cereals	Oat	100 g	0.1	1	0.1	1750.15	1732.39	453.893	3936.43	#REF!	393.643
	FRIDAY	Omelette. Infusion	Omelette	Eggs	2 units	0.13	1	0.13	2833.92	359.058	480.534	3673.52	#REF!	477.557
				Olive oil	2 spoons	0.03	1	0.03	10592.7	2570.89	25.5307	13189.1	#REF!	395.673
				Garlic	1 clove	0.01	1	0.01	317.415	188.052	203.767	709.235	#REF!	7.09235
			Infusion	Water	20 cl	0.2	1	0.2	0	0	0	0	#REF!	0
				Mint	8 g	0.008	1	0.008	259.801	95.0116	0	354.813	#REF!	2.8385
	SATURDAY	Homemade ensaimada. Orange juice	Homemade ensaimada	Flour	600 g	0.6	15	0.04	1410.44	48.1669	282.773	1741.39	#REF!	69.6554
				Sugar	200 g	0.2	15	0.0133333	516.771	733.748	0	1250.52	#REF!	16.6736
				Lard	125 g	0.125	15	0.00833333	3443.2	424.358	567.794	4435.35	#REF!	36.9613
				Eggs	3 units	0.195	15	0.013	2833.92	359.058	480.534	3673.52	#REF!	47.7557
				Yeast	20 g	0.02	15	0.00133333	0	0	0	0	#REF!	0
				Water	150 ml	0.15	15	0.01	0	0	0	0	#REF!	0
			Orange juice	Oranges	2 units	0.45	1	0.45	223.165	159.756	54.5352	437.456	#REF!	196.855
	SUNDAY	Bread with olive oil. Infusion	Bread with olive oil	Bread	2 units	0.04	1	0.04	1226.47	41.8842	245.89	1514.25	#REF!	60.5699
				Olive oil	1 spoon	0.015	1	0.015	10592.7	2570.89	25.5307	13189.1	#REF!	197.836
			Infusion	Water	20 cl	0.2	1	0.2	0	0	0	0	#REF!	0
				Mint	8 g	0.008	1	0.008	259.801	95.0116	0	354.813	#REF!	2.8385
	MORNING SNACK
	MONDAY	Bread with lacón	Bread with lacón	Bread	1/3 unit	0.083	1	0.083	1226.47	41.8842	245.89	1514.25	#REF!	125.683
				Lacón	50 g	0.05	1	0.05	5981.07	891.347	873.09	7745.51	#REF!	387.275
	TUESDAY	Manchego cheese with oil	Manchego cheese with oil	Manchego cheese	50 g	0.05	1	0.05	6744.09	960.802	1144.2	8849.1	#REF!	442.455
				Bread	1/3 unit	0.083	1	0.083	1226.47	41.8842	245.89	1514.25	#REF!	125.683
				Olive oil	1 spoon	0.015	1	0.015	10592.7	2570.89	25.5307	13189.1	#REF!	197.836
	WEDNESDAY	Humus with pita bread	Humus with pita bread	Chickpeas	570 g	0.57	4	0.1425	3029.56	45.3962	0	3074.96	#REF!	438.181
				Lemon	1/2 unit	0.055	4	0.01375	222.097	158.993	54.2743	435.364	#REF!	5.98626
				Olive oil	15 ml	0.014	4	0.0035	10592.7	2570.89	25.5307	13189.1	#REF!	46.1618
				Garlic	1 clove	0.005	4	0.00125	317.415	188.052	203.767	709.235	#REF!	0.886543
				Cumin	1 spoon	0.005	4	0.00125	259.801	95.0116	0	354.813	#REF!	0.443516
				Pita bread	4 units	0.26	4	0.065	1226.47	41.8842	245.89	1514.25	#REF!	98.4261
				Butter	100 g	0.1	4	0.025	7424.59	1040.27	1259.65	9724.52	#REF!	243.113
				Yoghurt	1 unit	0.125	4	0.03125	1585.94	222.209	269.07	2077.22	#REF!	64.913
				Sweet paprika	1 spoon	0.005	4	0.00125	6759.63	291.794	666.723	7718.15	#REF!	9.64769
	THURSDAY	Vegetables mix	Vegetables mix	Carrots	30 g	0.03	4	0.0075	56.3364	90.6329	34.9761	181.945	#REF!	1.36459
				Celery	20 g	0.02	4	0.005	56.3364	90.6329	34.9761	181.945	#REF!	0.909727
				Red pepper	60 g	0.06	4	0.015	38.7774	2.64643	36.7628	78.1866	#REF!	1.1728
				Cucumber	90 g	0.09	4	0.0225	32.0963	32.3634	24.1979	88.6576	#REF!	1.9948
				Cheese	120 g	0.12	4	0.03	6744.09	960.802	1144.2	8849.1	#REF!	265.473
				Olive oil	200ml	0.184	6	0.0306667	10592.7	2570.89	25.5307	13189.1	#REF!	404.466
				Egg	1unit	0.065	6	0.0108333	2833.92	359.058	480.534	3673.52	#REF!	39.7964
				Lemon	1unit	0.11	6	0.0183333	222.097	158.993	54.2743	435.364	#REF!	7.98168
	FRIDAY	Fruits juice	Fruits juice	Orange	2 units	0.45	2	0.225	223.165	159.756	54.5352	437.456	#REF!	98.4276
				Lemon	1 unit	0.11	2	0.055	222.097	158.993	54.2743	435.364	#REF!	23.945
				Apple	1 unit	0.2	2	0.1	279.705	195.764	60.3323	535.802	#REF!	53.5802
	SATURDAY	Bread with serrano ham	Bread with serrano ham	Bread	1/3 unit	0.083	1	0.083	1226.47	41.8842	245.89	1514.25	#REF!	125.683
				Serrano ham	50 g	0.05	1	0.05	5370.76	800.393	783.999	6955.15	#REF!	347.758
	SUNDAY	Mussels	Mussels	Mussels	1 unit	0.07	1	0.07	0	0	0	0	#REF!	0
	LUNCH
	MONDAY	Chickpeas, vegetables and tuna salad. Cottage cheese with quince.	Chickpeas, vegetables and tuna salad	Chickpeas	300 g	0.3	4	0.075	3029.56	45.3962	0	3074.96	#REF!	230.622
				Tomato	3 units	0.45	4	0.1125	34.6024	22.7592	25.4099	82.7716	#REF!	9.3118
				Onion	1/2 unit	0.075	4	0.01875	76.5967	114.99	91.7774	283.364	#REF!	5.31307
				Tuna	125 g	0.125	4	0.03125	0	0	0	0	#REF!	0
				Egg	2 units	0.13	4	0.0325	2833.92	359.058	480.534	3673.52	#REF!	119.389
				Red pepper	1 unit	0.22	4	0.055	38.7774	2.64643	36.7628	78.1866	#REF!	4.30026
				Carrots	1 unit	0.08	4	0.02	56.3364	90.6329	34.9761	181.945	#REF!	3.63891
				Garlic	1 clove	0.005	4	0.00125	317.415	188.052	203.767	709.235	#REF!	0.886543
			Cottage cheese	Cottage cheese	125 g	0.125	1	0.125	4248.78	595.305	720.846	5564.93	#REF!	695.616
				Walnuts	3 units	0.036	1	0.036	2284.5	777.957	0	3062.46	#REF!	110.248
				Honey	1 spoon	0.01	1	0.01	0	0	0	0	#REF!	0
			Quince	Quince fruits	1kg	1	4	0.25	285.458	199.79	61.573	546.82	#REF!	136.705
				Sugar	400g	0.4	4	0.1	516.771	733.748	0	1250.52	#REF!	125.052
				Lemon	1unit	0.11	4	0.0275	222.097	158.993	54.2743	435.364	#REF!	11.9725
	TUESDAY	Asparagus with garlic. Pinchos morunos of chicken with pilaf rice. Strawberries.	Asparagus with garlic	Olive oil	2 spoons	0.03	2	0.015	10592.7	2570.89	25.5307	13189.1	#REF!	197.836
				Garlic	1 clove	0.005	2	0.0025	317.415	188.052	203.767	709.235	#REF!	1.77309
				Asparagus	750 g	0.75	2	0.375	1005.47	1482.4	393.765	2881.64	#REF!	1080.61
			Pinchos morunos of chicken with pilaf rice	Rice	100 g	0.1	3	0.0333333	493.963	1739.43	0	2233.4	#REF!	74.4465
				Chicken	1 kg	1	3	0.333333	2685.7	320.999	442.879	3449.58	#REF!	1149.86
				Onion	1/2 unit	0.075	3	0.025	76.5967	114.99	91.7774	283.364	#REF!	7.08409
				Red pepper	1/2 unit	0.11	3	0.0366667	38.7774	2.64643	36.7628	78.1866	#REF!	2.86684
				Olive oil	2 spoons	0.03	3	0.01	10592.7	2570.89	25.5307	13189.1	#REF!	131.891
			Strawberries	Strawberries	5 units	0.085	1	0.085	65.6624	110.332	33.1803	209.174	#REF!	17.7798
	WEDNESDAY	Grilled zucchinis. Pasta with bolognese sauce Banana.	Grilled zucchinis	Zucchinis	2 units	0.2	2	0.1	50.4066	32.8426	38.3574	121.607	#REF!	12.1607
				Onion	2 units	0.3	2	0.15	76.5967	114.99	91.7774	283.364	#REF!	42.5045
				Tomato	1 unit	0.15	2	0.075	34.6024	22.7592	25.4099	82.7716	#REF!	6.20787
				Pepper	1 spoon	0.005	2	0.0025	6759.63	291.794	666.723	7718.15	#REF!	19.2954
				Olive oil	2 spoons	0.03	2	0.015	10592.7	2570.89	25.5307	13189.1	#REF!	197.836
				Oregano	1 spoon	0.005	2	0.0025	259.801	95.0116	0	354.813	#REF!	0.887032
			Pasta with bolognese sauce	Espaghetti	400 g	0.4	4	0.1	1410.44	48.1669	282.773	1741.39	#REF!	174.139
				Onion	1 unit	0.15	4	0.0375	76.5967	114.99	91.7774	283.364	#REF!	10.6261
				carrot	4 units	0.32	4	0.08	56.3364	90.6329	34.9761	181.945	#REF!	14.5556
				Garlic	2 cloves	0.01	4	0.0025	317.415	188.052	203.767	709.235	#REF!	1.77309
				Beef	500 g	0.5	4	0.125	11426.1	1008.19	1173.86	13608.1	#REF!	1701.02
				Tomato	5 units	0.75	4	0.1875	34.6024	22.7592	25.4099	82.7716	#REF!	15.5197
				Sugar	1 spoon	0.02	4	0.005	516.771	733.748	0	1250.52	#REF!	6.25259
				Cumin	1/2 spoon	0.0025	4	0.000625	259.801	95.0116	0	354.813	#REF!	0.221758
				Olive oil	1 spoon	0.015	4	0.00375	10592.7	2570.89	25.5307	13189.1	#REF!	49.4591
			Banana	Banana	1 unit	0.16	1	0.16	110.472	133.204	26.0512	269.728	#REF!	43.1565
	THURSDAY	Lentils cream. Sardines with red pepper salad. Curd with honey	cream de Lentils	Lentils	200 g	0.2	4	0.05	4258.33	439.395	0	4697.72	#REF!	234.886
				Carrots	2 units	0.16	4	0.04	56.3364	90.6329	34.9761	181.945	#REF!	7.27782
				Leek	1 unit	0.075	4	0.01875	76.5967	114.99	91.7774	283.364	#REF!	5.31307
				Potato	1 unit	0.175	4	0.04375	89.5155	76.8336	47.4466	213.796	#REF!	9.35356
				Garlic	1 unit	0.05	4	0.0125	317.415	188.052	203.767	709.235	#REF!	8.86543
				Cream	4 spoons	0.06	4	0.015	2537.5	355.535	430.512	3323.55	#REF!	49.8532
				Olive oil	2 spoons	0.03	4	0.0075	10592.7	2570.89	25.5307	13189.1	#REF!	98.9182
				Sweet paprika	1 spoon	0.005	4	0.00125	6759.63	291.794	666.723	7718.15	#REF!	9.64769
				Bread	20 units	0.04	4	0.01	1226.47	41.8842	245.89	1514.25	#REF!	15.1425
			Sardines with red pepper salad	Red pepper	8 units	1.76	4	0.44	38.7774	2.64643	36.7628	78.1866	#REF!	34.4021
				Sardines	4 units	0.16	4	0.04	0	0	0	0	#REF!	0
				Onion	1 unit	0.15	4	0.0375	76.5967	114.99	91.7774	283.364	#REF!	10.6261
				Olive oil	3 spoons	0.045	4	0.01125	10592.7	2570.89	25.5307	13189.1	#REF!	148.377
				Vinegar	3 spoons	0.021	4	0.00525	866.509	155.777	248.62	1270.91	#REF!	6.67225
			Curd with honey	Milk	1 l	1	4	0.25	1409.72	197.519	239.173	1846.42	#REF!	461.604
				Rennet	1 spoon	0.02	4	0.005	4248.78	595.305	720.846	5564.93	#REF!	27.8247
				Honey	4 spoons	0.04	4	0.01	0	0	0	0	#REF!	0
	FRIDAY	Tomato salad Chicken in pepitoria sauce with rice. Peaches with red wine.	Tomato salad	Tomato	4 units	0.6	4	0.15	34.6024	22.7592	25.4099	82.7716	#REF!	12.4157
				Cucumber	1 unit	0.125	4	0.03125	32.0963	32.3634	24.1979	88.6576	#REF!	2.77055
				Onion	1 unit	0.15	4	0.0375	76.5967	114.99	91.7774	283.364	#REF!	10.6261
				Lemon	1 unit	0.11	4	0.0275	222.097	158.993	54.2743	435.364	#REF!	11.9725
				Capers	50 g	0.05	4	0.0125	80.9564	87.6046	53.1427	221.704	#REF!	2.7713
				Pickles	100 g	0.1	4	0.025	32.0963	32.3634	24.1979	88.6576	#REF!	2.21644
			Chicken in pepitoria sauce with rice	Chicken	1 kg	1	4	0.25	2685.7	320.999	442.879	3449.58	#REF!	862.394
				Olive oil	1 dl	0.092	4	0.023	10592.7	2570.89	25.5307	13189.1	#REF!	303.349
				Onion	125 g	0.125	4	0.03125	76.5967	114.99	91.7774	283.364	#REF!	8.85511
				Garlic	2 cloves	0.01	4	0.0025	317.415	188.052	203.767	709.235	#REF!	1.77309
				White wine	1 dl	0.089	4	0.02225	866.509	155.777	248.62	1270.91	#REF!	28.2776
				Flour	10 g	0.01	4	0.0025	1410.44	48.1669	282.773	1741.39	#REF!	4.35346
				Almonds	15 g	0.015	4	0.00375	13079	1000.01	0	14079	#REF!	52.7963
				Egg	2 units	0.13	4	0.0325	2833.92	359.058	480.534	3673.52	#REF!	119.389
				Sweet paprika	15 g	0.015	4	0.00375	6759.63	291.794	666.723	7718.15	#REF!	28.9431
				Rice	150 g	0.15	4	0.0375	493.963	1739.43	0	2233.4	#REF!	83.7523
			Peaches with red wine	Peaches	4 units	0.8	4	0.2	341.667	223.729	75.8052	641.201	#REF!	128.24
				Red wine	33 cl	0.294	4	0.0735	866.509	155.777	248.62	1270.91	#REF!	93.4115
				Sugar	100 g	0.1	4	0.025	516.771	733.748	0	1250.52	#REF!	31.263
				Lemon	1 unit	0.11	4	0.0275	222.097	158.993	54.2743	435.364	#REF!	11.9725
	SATURDAY	Ajoblanco Pork fillets with burgul wheat salad. Watermelon	Ajoblanco	Bread	250 g	0.25	4	0.0625	1226.47	41.8842	245.89	1514.25	#REF!	94.6405
				Almonds	100 g	0.1	4	0.025	13079	1000.01	0	14079	#REF!	351.975
				Garlic	2 cloves	0.01	4	0.0025	317.415	188.052	203.767	709.235	#REF!	1.77309
				Vinegar	1 spoon	0.007	4	0.00175	866.509	155.777	248.62	1270.91	#REF!	2.22408
				Olive oil	25 cl	0.23	4	0.0575	10592.7	2570.89	25.5307	13189.1	#REF!	758.373
			Pork fillets with burgul wheat salad.	Pork fillets	2 units	1.2	4	0.3	5551.75	822.091	810.419	7184.26	#REF!	2155.28
				Onion	1 unit	0.15	4	0.0375	76.5967	114.99	91.7774	283.364	#REF!	10.6261
				Carrots	1 unit	0.08	4	0.02	56.3364	90.6329	34.9761	181.945	#REF!	3.63891
				Olive oil	1,5 dl	0.138	4	0.0345	10592.7	2570.89	25.5307	13189.1	#REF!	455.024
				Wine	25 cl	0.2225	4	0.055625	866.509	155.777	248.62	1270.91	#REF!	70.6941
				Cream	4 spoons	0.06	4	0.015	2537.5	355.535	430.512	3323.55	#REF!	49.8532
				Tomato	1 unit	0.15	4	0.0375	34.6024	22.7592	25.4099	82.7716	#REF!	3.10393
				Celery	100 g	0.1	4	0.025	56.3364	90.6329	34.9761	181.945	#REF!	4.54863
				Parsley	100 g	0.1	4	0.025	7627.07	10771.6	0	18398.6	#REF!	459.966
				Onion	150 g	0.15	4	0.0375	76.5967	114.99	91.7774	283.364	#REF!	10.6261
				Wheat Burgol	120 g	0.12	4	0.03	1553.46	53.0507	311.445	1917.95	#REF!	57.5386
			Watermelon	Watermelon	1/10 unit	0.4	1	0.4	73.3865	52.7406	28.7241	154.851	#REF!	61.9405
	SUNDAY	Gazpacho Pork chops with fried eggplants.Chocolate cream	Gazpacho	Tomato	6 units	0.9	2	0.45	34.6024	22.7592	25.4099	82.7716	#REF!	37.2472
				Cucumber	1/2 unit	0.0625	2	0.03125	32.0963	32.3634	24.1979	88.6576	#REF!	2.77055
				Green pepper	1/2 unit	0.1	2	0.05	38.7774	2.64643	36.7628	78.1866	#REF!	3.90933
				Garlic	1 clove	0.005	2	0.0025	317.415	188.052	203.767	709.235	#REF!	1.77309
				Bread	2 units	0.04	2	0.02	1226.47	41.8842	245.89	1514.25	#REF!	30.285
				Olive oil	3 spoons	0.045	2	0.0225	10592.7	2570.89	25.5307	13189.1	#REF!	296.755
				Vinegar	1 spoon	0.007	2	0.0035	866.509	155.777	248.62	1270.91	#REF!	4.44817
			Pork chops with fried eggplants	Pork chops	16 units	1.12	4	0.28	5446.2	363.526	1.52607	5811.25	#REF!	1627.15
				Eggplant	3 units	0.81	4	0.2025	49.65	109.183	39.283	198.116	#REF!	40.1185
				Olive oil	25 cl	0.23	4	0.0575	10592.7	2570.89	25.5307	13189.1	#REF!	758.373
				Flour	200 g	0.2	4	0.05	1410.44	48.1669	282.773	1741.39	#REF!	87.0693
				Lemon	1 unit	0.11	4	0.0275	222.097	158.993	54.2743	435.364	#REF!	11.9725
			Chocolate cream	Cocoa powder	30 g	0.03	4	0.0075	14838.7	0	99.4097	14938.1	#REF!	112.036
				Milk	500 cl	5	4	1.25	1409.72	197.519	239.173	1846.42	#REF!	2308.02
				Cornstarch	30 g	0.03	4	0.0075	471.719	554.631	223.784	1250.13	#REF!	9.376
				Sugar	45 g	0.045	4	0.01125	516.771	733.748	0	1250.52	#REF!	14.0683
	DINNER
	MONDAY	Cucumber cream. Tomato and mozarella sandwich. Watermelon	Cucumber cream	Cucumber	2 units	0.25	2	0.125	32.0963	32.3634	24.1979	88.6576	#REF!	11.0822
				Avocado	1 unit	0.2	2	0.1	578.782	204.033	143.207	926.022	#REF!	92.6022
				Yoghurt	2 units	0.25	2	0.125	1585.94	222.209	269.07	2077.22	#REF!	259.652
				Garlic	1/2 cloves	0.0025	2	0.00125	317.415	188.052	203.767	709.235	#REF!	0.886543
				Olive oil	1 spoon	0.015	2	0.0075	10592.7	2570.89	25.5307	13189.1	#REF!	98.9182
			Tomato and mozarella sandwich	Bread	2 units	0.04	1	0.04	1226.47	41.8842	245.89	1514.25	#REF!	60.5699
				Tomato	2 units	0.3	1	0.3	34.6024	22.7592	25.4099	82.7716	#REF!	24.8315
				Mozarella	25 g	0.025	1	0.025	4248.78	595.305	720.846	5564.93	#REF!	139.123
			Watermelon	Watermelon	1/10 unit	0.4	1	0.4	73.3865	52.7406	28.7241	154.851	#REF!	61.9405
	TUESDAY	Octopus and vegetables empanada with salad. Melon	Octopus and vegetables empanada	Flour	500 g	0.5	4	0.125	1410.44	48.1669	282.773	1741.39	#REF!	217.673
				Yeast	12 g	0.012	4	0.003	0	0	0	0	#REF!	0
				Sweet paprika	1 spoon	0.005	4	0.00125	6759.63	291.794	666.723	7718.15	#REF!	9.64769
				Tomato	2 units	0.3	4	0.075	34.6024	22.7592	25.4099	82.7716	#REF!	6.20787
				Olive oil	150 ml	0.138	4	0.0345	10592.7	2570.89	25.5307	13189.1	#REF!	455.024
				Onion	1 unit	0.15	4	0.0375	76.5967	114.99	91.7774	283.364	#REF!	10.6261
				Octopus	400 g	0.4	4	0.1	0	0	0	0	#REF!	0
				Green pepper	1 unit	0.2	4	0.05	38.7774	2.64643	36.7628	78.1866	#REF!	3.90933
				Garlic	3 cloves	0.015	4	0.00375	317.415	188.052	203.767	709.235	#REF!	2.65963
			Salad	Lettuce	100 g	0.1	1	0.1	47.2055	73.0526	58.5621	178.82	#REF!	17.882
				Tomato	1 unit	0.15	1	0.15	34.6024	22.7592	25.4099	82.7716	#REF!	12.4157
				Maize	50 g	0.05	1	0.05	345.027	405.671	163.682	914.38	#REF!	45.719
				Tuna	50 g	0.05	1	0.05	0	0	0	0	#REF!	0
			Melon	Melon	1/8 unit	0.25	1	0.25	84.5939	61.4582	43.8868	189.939	#REF!	47.4847
	WEDNESDAY	Green beans with garlic. Baked sea bass with potatoes. Cherries	Green beans with garlics	Green beans	800 g	0.8	4	0.2	101.723	88.1232	120.628	310.474	#REF!	62.0949
				Garlic	2 cloves	0.01	4	0.0025	317.415	188.052	203.767	709.235	#REF!	1.77309
				Olive oil	2 spoons	0.03	4	0.0075	10592.7	2570.89	25.5307	13189.1	#REF!	98.9182
				Thyme	1 spoon	0.005	4	0.00125	259.801	95.0116	0	354.813	#REF!	0.443516
				Lemon	1 unit	0.11	4	0.0275	222.097	158.993	54.2743	435.364	#REF!	11.9725
			Baked sea bass with potatoes	Seabass	1200 g	1.2	4	0.3	0	0	0	0	#REF!	0
				Potatoes	3 units	0.525	4	0.13125	89.5155	76.8336	47.4466	213.796	#REF!	28.0607
				Green pepper	1 unit	0.2	4	0.05	38.7774	2.64643	36.7628	78.1866	#REF!	3.90933
				Tomato	1 unit	0.15	4	0.0375	34.6024	22.7592	25.4099	82.7716	#REF!	3.10393
				Onion	1 unit	0.15	4	0.0375	76.5967	114.99	91.7774	283.364	#REF!	10.6261
				Garlic	2 cloves	0.01	4	0.0025	317.415	188.052	203.767	709.235	#REF!	1.77309
				White wine	25 cl	0.2225	4	0.055625	866.509	155.777	248.62	1270.91	#REF!	70.6941
			Cherries	Cherries	10 units	0.05	1	0.05	1565.91	1095.97	337.767	2999.65	#REF!	149.983
	THURSDAY	Pisto with eggs. Fruit salad.	Pisto with eggs	Onion	2 units	0.3	4	0.075	76.5967	114.99	91.7774	283.364	#REF!	21.2523
				Green pepper	2 units	0.4	4	0.1	38.7774	2.64643	36.7628	78.1866	#REF!	7.81866
				Zucchini	1 unit	0.1	4	0.025	50.4066	32.8426	38.3574	121.607	#REF!	3.04017
				Tomato	1 kg	1	4	0.25	34.6024	22.7592	25.4099	82.7716	#REF!	20.6929
				Bread	4 units	0.08	4	0.02	1226.47	41.8842	245.89	1514.25	#REF!	30.285
				Egg	4 units	0.26	4	0.065	2833.92	359.058	480.534	3673.52	#REF!	238.779
				Onion	2 units	0.2	4	0.05	76.5967	114.99	91.7774	283.364	#REF!	14.1682
				Sugar	2 spoons	0.04	4	0.01	516.771	733.748	0	1250.52	#REF!	12.5052
				Vinegar	2 spoons	0.014	4	0.0035	866.509	155.777	248.62	1270.91	#REF!	4.44817
				Olive oil	5 spoons	0.075	4	0.01875	10592.7	2570.89	25.5307	13189.1	#REF!	247.296
			Fruit salad	Cheese	450 g	0.45	8	0.05625	6744.09	960.802	1144.2	8849.1	#REF!	497.762
				Condensed milk	400 g	0.4	8	0.05	2537.5	360.535	430.512	3328.55	#REF!	166.427
				Peaches	850 g	0.85	8	0.10625	341.667	223.729	75.8052	641.201	#REF!	68.1276
				Banana	2 units	0.32	8	0.04	110.472	133.204	26.0512	269.728	#REF!	10.7891
				Strawberries	250 g	0.25	8	0.03125	65.6624	110.332	33.1803	209.174	#REF!	6.5367
				Melon	1/2 unit	1	8	0.125	84.5939	61.4582	43.8868	189.939	#REF!	23.7424
	FRIDAY	Artichokes with serrano ham. Hake with grilled potatoes.Melon.	Artichokes with serrano ham	Artichokes	16 units	1.52	4	0.38	307.75	154.217	109.62	571.587	#REF!	217.203
				Serrano ham	200 g	0.2	4	0.05	5370.76	800.393	783.999	6955.15	#REF!	347.758
				Flour	1 spoon	0.015	4	0.00375	1410.44	48.1669	282.773	1741.39	#REF!	6.53019
				Lemon	1/2 unit	0.055	4	0.01375	222.097	158.993	54.2743	435.364	#REF!	5.98626
				Olive oil	2 spoons	0.03	4	0.0075	10592.7	2570.89	25.5307	13189.1	#REF!	98.9182
			Hake with grilled potatoes	Hake	1,4 kg	1.4	4	0.35	0	0	0	0	#REF!	0
				Potatoes	3 units	0.525	4	0.13125	89.5155	76.8336	47.4466	213.796	#REF!	28.0607
				Onion	1 unit	0.15	4	0.0375	76.5967	114.99	91.7774	283.364	#REF!	10.6261
				Olive oil	2 spoons	0.03	4	0.0075	10592.7	2570.89	25.5307	13189.1	#REF!	98.9182
			Melon	Melon	1/8 unit	0.25	1	0.25	84.5939	61.4582	43.8868	189.939	#REF!	47.4847
	SATURDAY	Pizza and salad. Sorbete de Lemon	Tomato and mozarella pizza	Flour	500 g	0.5	4	0.125	1410.44	48.1669	282.773	1741.39	#REF!	217.673
				Yeast	25 g	0.025	4	0.00625	0	0	0	0	#REF!	0
				Tomato	1 kg	1	4	0.25	34.6024	22.7592	25.4099	82.7716	#REF!	20.6929
				Olive oil	4 cl	0.037	4	0.00925	10592.7	2570.89	25.5307	13189.1	#REF!	121.999
				Mozarella	350 g	0.35	4	0.0875	4248.78	595.305	720.846	5564.93	#REF!	486.931
				Sugar	1 spoon	0.02	4	0.005	516.771	733.748	0	1250.52	#REF!	6.25259
			Salad	Lettuce	100 g	0.1	1	0.1	47.2055	73.0526	58.5621	178.82	#REF!	17.882
				Tomato	1 unit	0.15	1	0.15	34.6024	22.7592	25.4099	82.7716	#REF!	12.4157
				Maize	50 g	0.05	1	0.05	345.027	405.671	163.682	914.38	#REF!	45.719
				Tuna	50 g	0.05	1	0.05	0	0	0	0	#REF!	0
			Lemon sorbet	Lemon	4 units	0.44	1	0.44	222.097	158.993	54.2743	435.364	#REF!	191.56
				Sugar	250 g	0.25	1	0.25	516.771	733.748	0	1250.52	#REF!	312.63
				Water	600 g	0.6	1	0.6	0	0	0	0	#REF!	0
				Egg	3 units	0.195	1	0.195	2833.92	359.058	480.534	3673.52	#REF!	716.336
				Lemon skin	1/2 unit	0.055	1	0.055	580.182	414.526	141.479	1136.19	#REF!	62.4903
				Cinnamon	1/2 unit	0.005	1	0.005	11986.7	0	740.35	12727.1	#REF!	63.6354
	SUNDAY	Melon with serrano ham. Vegetables mix. Yoghurt	Melon with serrano ham	Melon	1/2 kg	0.5	4	0.125	84.5939	61.4582	43.8868	189.939	#REF!	23.7424
				Serrano ham	100 g	0.1	4	0.025	5370.76	800.393	783.999	6955.15	#REF!	173.879
				Tomato	1 unit	0.15	4	0.0375	34.6024	22.7592	25.4099	82.7716	#REF!	3.10393
				Lettuce	50 g	0.05	4	0.0125	47.2055	73.0526	58.5621	178.82	#REF!	2.23525
				Pepper	1 spoon	0.005	4	0.00125	6759.63	291.794	666.723	7718.15	#REF!	9.64769
			Vegetables mix	Cauliflower	1/2 unit	0.75	4	0.1875	73.7717	104.056	82.9502	260.778	#REF!	48.8959
				Green beans	200 g	0.2	4	0.05	101.723	88.1232	120.628	310.474	#REF!	15.5237
				Asparagus	8 units	0.2	4	0.05	1005.47	1482.4	393.765	2881.64	#REF!	144.082
				Carrots	2 units	0.16	4	0.04	56.3364	90.6329	34.9761	181.945	#REF!	7.27782
				Artichokes	4 units	0.38	4	0.095	307.75	154.217	109.62	571.587	#REF!	54.3007
				Chard	2 units	1.6	4	0.4	70.5155	114.363	88.4911	273.37	#REF!	109.348
				Spinach	200 g	0.2	4	0.05	70.5155	114.363	88.4911	273.37	#REF!	13.6685
				Serrano ham	100 g	0.1	4	0.025	5370.76	800.393	783.999	6955.15	#REF!	173.879
				Lemon	1/2 unit	0.055	4	0.01375	222.097	158.993	54.2743	435.364	#REF!	5.98626
				Olive oil	4 spoons	0.06	4	0.015	10592.7	2570.89	25.5307	13189.1	#REF!	197.836
			Yoghurt	Yoghurt	1 unit	0.125	1	0.125	1585.94	222.209	269.07	2077.22	#REF!	259.652
