# Supplementary material
Source: MDPI journal article supplement (https://www.mdpi.com/2073-4441/8/10/448)
Supplement: s3 [file s3]

## Sheet: USDAr-Menu1
	Day	Recipe	Dishes	Products	Quantity	Grams	Kilograms	Servings	Kg/person	WATER FOOTRPINT (m3*ton-1) or (l * kg-1)				Water consumed/person
										Green WF	Blue WF	Grey WF	Total WF	m3/person	Liters/person
	BREAKFAST
	MONDAY	Peanut Butter. Raisin Oatmeal. Orange Juice	Orange Juice	Oranges	3 units	393	0.393	1	0.393	231.437	57.3139	43.0271	331.778	#REF!	130.389
			Raisin Oatmeal	Raisins	1/4 cup	36.25	0.03625	1	0.03625	478.39	838.525	348.743	1665.66	#REF!	60.3801
				Oat	1/2 cup	117	0.117	1	0.117	1774.95	803.693	290.863	2869.5	#REF!	335.732
				Water	1 cup	237	0.237	1	0.237	0	0	0	0	#REF!	0
			Peanut Butter	Peanuts	2 cups	292	0.292	4	0.073	249.477	111.345	164.446	525.268	#REF!	38.3445
				Peanut oil	1 cup	145	0.145	4	0.03625	5318.85	39.116	711.853	6069.82	#REF!	220.031
				Honey	4 spoons	40	0.04	4	0.01	0	0	0	0	#REF!	0
				Cinnamon	2 spoons	4	0.004	4	0.001	11986.7	0	740.35	12727.1	#REF!	12.7271
				Chocolate chips	4 spoons	50	0.05	4	0.0125	16492.3	0	166.086	16658.4	#REF!	208.23
	TUESDAY	Toasted oat-cereal with milk and a banana. Coffee. Hard-cooked Egg.	Hard-cooked Egg	Egg	1 unit	44	0.044	1	0.044	1205.87	130.436	229.547	1565.86	#REF!	68.8978
			Toasted oat-cereal with milk and a banana	Banana	1 unit	118	0.118	1	0.118	371.665	314.794	75.5526	762.011	#REF!	89.9173
				Oat	1 cup	234	0.234	1	0.234	1774.95	803.693	290.863	2869.5	#REF!	671.464
				Low fat milk	1/4 cup	61	0.061	1	0.061	668.136	61.5251	91.7321	821.394	#REF!	50.105
			Coffee	Coffee	2,5 spoons	45	0.045	1	0.045	7877.22	0	7826.29	15703.5	#REF!	706.658
				Water	8 ounces	237	0.237	1	0.237	0	0	0	0	#REF!	0
	WEDNESDAY	Scrambled Eggs. Turkey Sausage Links. Whole-wheat Toast with Tub Margarine and Jelly. Apple Juice.	Apple Juice	Apple Juice	1 cup	248	0.248	1	0.248	206.011	338.737	75.5823	620.33	#REF!	153.842
			Whole-wheat Toast with Tub Margarine and Jelly	Bread	1 unit	28	0.028	1	0.028	1644.92	80.8688	201.68	1927.47	#REF!	53.9692
				Margarine	1 spoon	15	0.015	1	0.015	3518.87	324.035	483.126	4326.03	#REF!	64.8905
				Grapes	125g	125	0.125	1	0.125	205.601	57.4884	39.6227	302.712	#REF!	37.839
				Water	1/2 cup	118.5	0.1185	1	0.1185	0	0	0	0	#REF!	0
				Sugar	75g	75	0.075	1	0.075	1480.64	212.518	109.902	1803.06	#REF!	135.229
			Turkey Sausage	Turkey Sausage	2 units	114	0.114	1	0.114	1727.8	186.99	302.595	2217.38	#REF!	252.782
			Scrambled Eggs	Vegetal oil	1 spoon	18	0.018	1	0.018	5318.85	39.116	711.853	6069.82	#REF!	109.257
				Milk	2 spoons	30.5	0.0305	1	0.0305	1202.65	110.745	165.118	1478.51	#REF!	45.0945
				Eggs	2 units	88	0.088	1	0.088	1205.87	130.436	229.547	1565.86	#REF!	137.796
	THURSDAY	Banana Walnut Oatmeal. Orange. Low fat Milk.	Low fat Milk	Low fat milk	1 cup	245	0.245	1	0.245	668.136	61.5251	91.7321	821.394	#REF!	201.241
			Orange	Orange	1 unit	131	0.131	1	0.131	231.437	57.3139	43.0271	331.778	#REF!	43.4629
			Banana Walnut Oatmeal	Milk powder	2/3 cup	84.48	0.08448	4	0.02112	3006.61	276.863	412.795	3696.27	#REF!	78.0652
				Water	2 3/4 cups	651.75	0.65175	4	0.162938	0	0	0	0	#REF!	0
				Oat	2 cups	468	0.468	4	0.117	1774.95	803.693	290.863	2869.5	#REF!	335.732
				Bananas	2 units	236	0.236	4	0.059	371.665	314.794	75.5526	762.011	#REF!	44.9587
				Walnuts	2 spoons	15	0.015	4	0.00375	1373.57	1978.74	3218.15	6570.47	#REF!	24.6393
			Maple syrup	Maple syrup	2 spoons	40	0.04	4	0.01	1480.64	212.518	109.902	1803.06	#REF!	18.0306
	FRIDAY	Open-faced Egg and Tomato on an English Muffin. Apple Juice.	Open-faced Egg and Tomato on an English Muffin	Eggs	2 units	88	0.088	1	0.088	1205.87	130.436	229.547	1565.86	#REF!	137.796
				Vegetal oil	1 spoon	18	0.018	1	0.018	5318.85	39.116	711.853	6069.82	#REF!	109.257
				Bread	2 units	114	0.114	1	0.114	1644.92	80.8688	201.68	1927.47	#REF!	219.732
				Tomato	1 unit	150	0.15	1	0.15	30.961	74.3575	21.742	127.06	#REF!	19.0591
				Cheddar cheese	28,25 g	28.25	0.02825	1	0.02825	3196.35	310.208	438.845	3945.41	#REF!	111.458
			Apple Juice	Apple Juice	1 cup	248	0.248	1	0.248	206.011	338.737	75.5823	620.33	#REF!	153.842
	SATURDAY	Scrambled Tofu Burrito with Salsa and Black Beans. Low fat Milk.	Scrambled tofu	Butter	1 spoon	15	0.015	4	0.00375	3518.87	324.035	483.126	4326.03	#REF!	16.2226
				Eggs	2 units	88	0.088	4	0.022	1205.87	130.436	229.547	1565.86	#REF!	34.4489
				Garlic	1 unit	50	0.05	4	0.0125	116.229	185.795	77.2332	379.257	#REF!	4.74071
				Soya	285 g	285	0.285	4	0.07125	1560.35	92.3647	9.59526	1662.31	#REF!	118.439
				Mushroom	5 g	5	0.005	4	0.00125	0	0	0	0	#REF!	0
				Cheese	28 g	28	0.028	4	0.007	3196.35	310.208	438.845	3945.41	#REF!	27.6179
				Onion	1 unit	12	0.012	4	0.003	53.3104	74.1469	31.8278	159.285	#REF!	0.477855
				Watercress	1 cup	34	0.034	4	0.0085	161.21	81.5517	83.0555	325.817	#REF!	2.76944
				Red pepper	1 unit	119	0.119	4	0.02975	94.5723	96.6315	58.2112	249.415	#REF!	7.4201
				Pepper	1 spoon	5	0.005	4	0.00125	6759.63	291.794	666.723	7718.15	#REF!	9.64769
			Tofu	Soya milk	2000 g	2000	2	5	0.4	2737.45	162.043	16.8338	2916.33	#REF!	1166.53
				Water	1 cup	237	0.237	5	0.0474	0	0	0	0	#REF!	0
			Salsa	Tomatoes	475 g	475	0.475	2	0.2375	30.961	74.3575	21.742	127.06	#REF!	30.1769
				Red pepper	1 unit	119	0.119	2	0.0595	94.5723	96.6315	58.2112	249.415	#REF!	14.8402
				Onion	1 unit	110	0.11	2	0.055	53.3104	74.1469	31.8278	159.285	#REF!	8.76068
				Coriander	8 g	8	0.008	2	0.004	3099.35	125.297	344.369	3569.02	#REF!	14.2761
				Lime juice	1 unit	58	0.058	2	0.029	251.419	52.3962	44.7845	348.6	#REF!	10.1094
				Pepper	6,5 g	6.5	0.0065	2	0.00325	94.5723	96.6315	58.2112	249.415	#REF!	0.810599
				Cumin powder	1 spoon	114	0.114	2	0.057	74.7639	29.5279	197.437	301.729	#REF!	17.1985
				Pepper	1 spoon	5	0.005	2	0.0025	6759.63	291.794	666.723	7718.15	#REF!	19.2954
			Burrito	Kidney beans	1/4 cup	172	0.172	2	0.086	1216.29	427.896	6140.53	7784.71	#REF!	669.485
				Eggs	4 units	176	0.176	4	0.044	1205.87	130.436	229.547	1565.86	#REF!	68.8978
				Maize	2 spoons	26.25	0.02625	4	0.0065625	522.429	63.2878	176.483	762.2	#REF!	5.00194
				Low fat milk	1 spoon	15.25	0.01525	4	0.0038125	668.136	61.5251	91.7321	821.394	#REF!	3.13156
				Red pepper	1 cup	149	0.149	4	0.03725	94.5723	96.6315	58.2112	249.415	#REF!	9.29071
				Onion	1 unit	110	0.11	4	0.0275	53.3104	74.1469	31.8278	159.285	#REF!	4.38034
				Garlic powder	1/4 spoon	0.75	0.00075	4	0.0001875	447.034	714.595	297.051	1458.68	#REF!	0.273502
				Flour	1 unit	32	0.032	1	0.032	1891.66	92.9991	231.932	2216.59	#REF!	70.9309
			Low fat milk	Low fat milk	1 cup	245	0.245	1	0.245	668.136	61.5251	91.7321	821.394	#REF!	201.241
	SUNDAY	Fantastic French Toast with Breadcake Syrup, Tub Margarine and Cinnamon. Banana. Orange Juice	Fantastic French Toast	Eggs	2 units	88	0.088	2	0.044	1205.87	130.436	229.547	1565.86	#REF!	68.8978
				Water	1/2 cup	118.5	0.1185	2	0.05925	0	0	0	0	#REF!	0
				Low fat milk	1/2 cup	122.5	0.1225	2	0.06125	668.136	61.5251	91.7321	821.394	#REF!	50.3104
				Vanilla	1 spoon	4	0.004	2	0.002	132320	64764.8	782.258	197867	#REF!	395.735
				Bread	6 units	168	0.168	2	0.084	1644.92	80.8688	201.68	1927.47	#REF!	161.908
				Cinnamon powder	2 spoons	15.6	0.0156	2	0.0078	11986.7	0	740.35	12727.1	#REF!	99.2713
			Vegetal oil	Vegetal oil	1 spoon	18	0.018	2	0.009	5318.85	39.116	711.853	6069.82	#REF!	54.6284
			Tub Margarine and Cinnamon	Cinnamon	1 spoon	2	0.002	1	0.002	11986.7	0	740.35	12727.1	#REF!	25.4542
				Margarine	2 spoons	30	0.03	1	0.03	3518.87	324.035	483.126	4326.03	#REF!	129.781
			Maple syrup	Maple syrup	1 spoon	20	0.02	1	0.02	1480.64	212.518	109.902	1803.06	#REF!	36.0611
			Banana	Banana	1 unit	119	0.119	1	0.119	371.665	314.794	75.5526	762.011	#REF!	90.6793
			Orange juice	Oranges	3 units	393	0.393	1	0.393	231.437	57.3139	43.0271	331.778	#REF!	130.389
	MORNING SNACK												0	#REF!	0
	MONDAY	Carrot Sticks with Dip. Crackers.	Carrot Sticks	Carrots	55 g	55	0.055	1	0.055	65.209	19.9602	39.1268	124.296	#REF!	6.83628
			Hummus	Olive oil	3 spoons	42	0.042	4	0.0105	2174.56	2606.99	360.252	5141.81	#REF!	53.989
				Chickpeas	500 g	500	0.5	4	0.125	1817.82	0	8339.31	10157.1	#REF!	1269.64
				Lemon	3 units	174	0.174	4	0.0435	251.419	52.3962	44.7845	348.6	#REF!	15.1641
				Garlic	3 cloves	15	0.015	4	0.00375	116.229	185.795	77.2332	379.257	#REF!	1.42221
				Pepper	2 spoons	10	0.01	4	0.0025	6759.63	291.794	666.723	7718.15	#REF!	19.2954
			Tahini	Sesame seeds	100 g	100	0.1	2	0.05	3099.35	125.297	344.369	3569.02	#REF!	178.451
				Olive oil	2 spoons	28	0.028	2	0.014	2174.56	2606.99	360.252	5141.81	#REF!	71.9854
			Crackers	Oat	3/4 cup	69.75	0.06975	10	0.006975	1774.95	803.693	290.863	2869.5	#REF!	20.0148
				Flour	2 1/2 cup	287.5	0.2875	10	0.02875	1891.66	92.9991	231.932	2216.59	#REF!	63.727
				Olive oil	1/3 cup	79.95	0.07995	10	0.007995	2174.56	2606.99	360.252	5141.81	#REF!	41.1088
				Water	1 cup	237	0.237	10	0.0237	0	0	0	0	#REF!	0
	TUESDAY	Popcorn. Orange.	Popcorn	Maize	5 spoons	40	0.04	1	0.04	522.429	63.2878	176.483	762.2	#REF!	30.488
				Vegetal oil	1 spoon	18	0.018	1	0.018	5318.85	39.116	711.853	6069.82	#REF!	109.257
			Orange	Orange	1 unit	131	0.131	1	0.131	231.437	57.3139	43.0271	331.778	#REF!	43.4629
	WEDNESDAY	Pretzels and Dip. Banana	Pretzel	Water	5,25 cups	1244.25	1.24425	12	0.103688	0	0	0	0	#REF!	0
				Sugar	9 spoons	180	0.18	12	0.015	1480.64	212.518	109.902	1803.06	#REF!	27.0458
				Yeast	4 spoons	16	0.016	12	0.00133333	0	0	0	0	#REF!	0
				Bicarbonate	1/2 cup	40	0.04	12	0.00333333	0	0	0	0	#REF!	0
				Flour	6 cups	690	0.69	12	0.0575	1891.66	92.9991	231.932	2216.59	#REF!	127.454
				Vegetal oil	1 spoon	18	0.018	12	0.0015	5318.85	39.116	711.853	6069.82	#REF!	9.10474
			Hummus	Olive oil	3 spoons	42	0.042	4	0.0105	2174.56	2606.99	360.252	5141.81	#REF!	53.989
				Chickpeas	500 g	500	0.5	4	0.125	1817.82	0	8339.31	10157.1	#REF!	1269.64
				Lemon	3 units	174	0.174	4	0.0435	251.419	52.3962	44.7845	348.6	#REF!	15.1641
				Garlic	3 cloves	15	0.015	4	0.00375	116.229	185.795	77.2332	379.257	#REF!	1.42221
				Pepper	2 spoons	10	0.01	4	0.0025	6759.63	291.794	666.723	7718.15	#REF!	19.2954
			Tahini	Sesame seeds	100 g	100	0.1	2	0.05	3099.35	125.297	344.369	3569.02	#REF!	178.451
				Olive oil	2 spoons	28	0.028	2	0.014	2174.56	2606.99	360.252	5141.81	#REF!	71.9854
			Banana	Banana	1 unit	119	0.119	1	0.119	371.665	314.794	75.5526	762.011	#REF!	90.6793
	THURSDAY	Banana Bread with Tub Margarine. Grapes.	Banana Bread	Bicarbonate	1 spoons	1	0.001	4	0.00025	0	0	0	0	#REF!	0
				Flour	45 g	45	0.045	4	0.01125	1891.66	92.9991	231.932	2216.59	#REF!	24.9367
				Yeast powder	1/2 spoon	1	0.001	4	0.00025	0	0	0	0	#REF!	0
				Egg	2 units	88	0.088	4	0.022	1205.87	130.436	229.547	1565.86	#REF!	34.4489
				Bananas	3 units	354	0.354	4	0.0885	371.665	314.794	75.5526	762.011	#REF!	67.438
				Sugar	1/4 cup	50	0.05	4	0.0125	1480.64	212.518	109.902	1803.06	#REF!	22.5382
				Vegetal oil	2 spoons	36	0.036	4	0.009	5318.85	39.116	711.853	6069.82	#REF!	54.6284
				Milk	1/3 cup	81.3	0.0813	4	0.020325	1202.65	110.745	165.118	1478.51	#REF!	30.0507
			Margarine	Margarine	1 spoon	15	0.015	4	0.00375	3518.87	324.035	483.126	4326.03	#REF!	16.2226
			Grapes	Grapes	1 cup	160	0.16	1	0.16	205.601	57.4884	39.6227	302.712	#REF!	48.4339
	FRIDAY	Banana Bread with Tub Margarine. Low fat Milk.	Low fat milk	Low fat milk	1 cup	245	0.245	1	0.245	668.136	61.5251	91.7321	821.394	#REF!	201.241
			Banana Bread	Bicarbonate	1 spoons	1	0.001	4	0.00025	0	0	0	0	#REF!	0
				Flour	45 g	45	0.045	4	0.01125	1891.66	92.9991	231.932	2216.59	#REF!	24.9367
				Yeast powder	1/2 spoon	1	0.001	4	0.00025	0	0	0	0	#REF!	0
				Egg	2 units	88	0.088	4	0.022	1205.87	130.436	229.547	1565.86	#REF!	34.4489
				Bananas	3 units	354	0.354	4	0.0885	371.665	314.794	75.5526	762.011	#REF!	67.438
				Sugar	1/4 cup	50	0.05	4	0.0125	1480.64	212.518	109.902	1803.06	#REF!	22.5382
				Vegetal oil	2 spoons	36	0.036	4	0.009	5318.85	39.116	711.853	6069.82	#REF!	54.6284
				Milk	1/3 cup	81.3	0.0813	4	0.020325	1202.65	110.745	165.118	1478.51	#REF!	30.0507
			Margarine	Margarine	1 spoon	15	0.015	4	0.00375	3518.87	324.035	483.126	4326.03	#REF!	16.2226
	SATURDAY	Yogurt Parfait.	Yogurt Parfait	Yogurt	2 units	250	0.25	1	0.25	751.653	69.2158	103.199	924.068	#REF!	231.017
				Oat	1/4 cup	58.5	0.0585	1	0.0585	1774.95	803.693	290.863	2869.5	#REF!	167.866
				Walnuts	1 spoon	7.5	0.0075	1	0.0075	1373.57	1978.74	3218.15	6570.47	#REF!	49.2785
				Raisins	1 spoon	9	0.009	1	0.009	478.39	838.525	348.743	1665.66	#REF!	14.9909
	SUNDAY	Banana Bread with Tub Margarine. Low fat Milk.	Low fat milk	Low fat milk	1 cup	245	0.245	1	0.245	668.136	61.5251	91.7321	821.394	#REF!	201.241
			Banana Bread	Bicarbonate	1 spoons	1	0.001	4	0.00025	0	0	0	0	#REF!	0
				Flour	45 g	45	0.045	4	0.01125	1891.66	92.9991	231.932	2216.59	#REF!	24.9367
				Yeast powder	1/2 spoon	1	0.001	4	0.00025	0	0	0	0	#REF!	0
				Egg	2 units	88	0.088	4	0.022	1205.87	130.436	229.547	1565.86	#REF!	34.4489
				Bananas	3 units	354	0.354	4	0.0885	371.665	314.794	75.5526	762.011	#REF!	67.438
				Sugar	1/4 cup	50	0.05	4	0.0125	1480.64	212.518	109.902	1803.06	#REF!	22.5382
				Vegetal oil	2 spoons	36	0.036	4	0.009	5318.85	39.116	711.853	6069.82	#REF!	54.6284
				Milk	1/3 cup	81.3	0.0813	4	0.020325	1202.65	110.745	165.118	1478.51	#REF!	30.0507
			Margarine	Margarine	1 spoon	15	0.015	4	0.00375	3518.87	324.035	483.126	4326.03	#REF!	16.2226
	LUNCH												0	#REF!	0
	MONDAY	Tuna-Cucumber Wrap. Low fat Milk. Low fat Vanilla Yogurt.	Tuna-Cucumber Wrap	Flour	1 unit	32	0.032	1	0.032	1891.66	92.9991	231.932	2216.59	#REF!	70.9309
				Tuna	1 can	85	0.085	1	0.085	0	0	0	0	#REF!	0
				Cucumber	1 unit	280	0.28	1	0.28	185.699	141.925	95.472	423.096	#REF!	118.467
			Mayonnaise	Egg yolk	1 unit	17	0.017	6	0.00283333	1205.87	135.436	229.547	1570.86	#REF!	4.45077
				Lemon	1 unit	58	0.058	6	0.00966667	251.419	52.3962	44.7845	348.6	#REF!	3.3698
				Vinegar	2 spoons	30	0.03	6	0.005	139.067	243.757	101.379	484.203	#REF!	2.42101
				Vegetal oil	3/4 cup	172.5	0.1725	6	0.02875	5318.85	39.116	711.853	6069.82	#REF!	174.507
			Mustard	Mustard powder	1 cup	101	0.101	10	0.0101	2155.51	0	638.81	2794.32	#REF!	28.2226
				White vinegar	2/3 cup	179.52	0.17952	10	0.017952	1100.69	133.339	371.825	1605.85	#REF!	28.8282
				Honey	1/3 cup	113	0.113	10	0.0113	0	0	0	0	#REF!	0
			Low fat Vanilla Yogurt	Yogurt	1 unit	125	0.125	1	0.125	751.653	69.2158	103.199	924.068	#REF!	115.508
			Low fat milk	Low fat milk	1 cup	245	0.245	1	0.245	668.136	61.5251	91.7321	821.394	#REF!	201.241
	TUESDAY	Green Salad with Honey Lemon Chicken with Vinaigrette Dressing. Whole-wheat Bread with Tub Margarine. Chocolate Chip Yogurtt Cookie. Low fat Milk.	Green Salad	Lettuce	40 g	40	0.04	1	0.04	29.5416	42.4175	40.9073	112.866	#REF!	4.51465
				Tomato	1 unit	150	0.15	1	0.15	30.961	74.3575	21.742	127.06	#REF!	19.0591
				Cucumber	1/2 unit	140	0.14	1	0.14	185.699	141.925	95.472	423.096	#REF!	59.2334
			Honey Lemon Chicken	Vegetal oil	4 spoons	72	0.072	4	0.018	5318.85	39.116	711.853	6069.82	#REF!	109.257
				Chicken	2 pounds	910	0.91	4	0.2275	1347.68	135.852	236.024	1719.56	#REF!	391.199
				Flour	1/2 cup	57.5	0.0575	4	0.014375	1891.66	92.9991	231.932	2216.59	#REF!	31.8635
				Honey	1/4 cup	84.75	0.08475	4	0.0211875	0	0	0	0	#REF!	0
				Lemon	2 units	116	0.116	4	0.029	251.419	52.3962	44.7845	348.6	#REF!	10.1094
			Vinaigrette Dressing	Vegetal oil	1,5 spoons	22.5	0.0225	1	0.0225	5318.85	39.116	711.853	6069.82	#REF!	136.571
				Vinegar	1/2 spoon	7.5	0.0075	1	0.0075	139.067	243.757	101.379	484.203	#REF!	3.63152
				Sugar	1/8 spoon	2.5	0.0025	1	0.0025	1480.64	212.518	109.902	1803.06	#REF!	4.50764
				Pepper	1 spoon	5	0.005	1	0.005	6759.63	291.794	666.723	7718.15	#REF!	38.5908
				Dried herbs	1/2 spoon	5	0.005	1	0.005	74.7639	29.5279	197.437	301.729	#REF!	1.50864
			Mustard	Mustard powder	1 cup	101	0.101	10	0.0101	2155.51	0	638.81	2794.32	#REF!	28.2226
				White vinegar	2/3 cup	179.52	0.17952	10	0.017952	1100.69	133.339	371.825	1605.85	#REF!	28.8282
				Honey	1/3 cup	113	0.113	10	0.0113	0	0	0	0	#REF!	0
			Chocolate Chip Yogurtt Cookie	Sugar	1/2 cup	100	0.1	12	0.00833333	1480.64	212.518	109.902	1803.06	#REF!	15.0255
				Brown sugar	1/2 cup	110	0.11	12	0.00916667	1384.39	198.705	102.758	1685.86	#REF!	15.4537
				Margarine	3 spoons	45	0.045	12	0.00375	3518.87	324.035	483.126	4326.03	#REF!	16.2226
				Yogurt	1 unit	125	0.125	12	0.0104167	751.653	69.2158	103.199	924.068	#REF!	9.62571
				Vanilla	7 g	7	0.007	12	0.000583333	132320	64764.8	782.258	197867	#REF!	115.423
				Flour	1 1/3 cup	153	0.153	12	0.01275	1891.66	92.9991	231.932	2216.59	#REF!	28.2615
				Bicarbonate	1/2 spoon	2.5	0.0025	12	0.000208333	0	0	0	0	#REF!	0
				Chocolate chips	225 g	225	0.225	12	0.01875	16492.3	0	166.086	16658.4	#REF!	312.344
			Whole-wheat Bread with Tub Margarine.	Bread	1 unit	28	0.028	1	0.028	1644.92	80.8688	201.68	1927.47	#REF!	53.9692
				Margarine	1 spoon	15	0.015	1	0.015	3518.87	324.035	483.126	4326.03	#REF!	64.8905
			Low fat milk	Low fat milk	1 cup	245	0.245	1	0.245	668.136	61.5251	91.7321	821.394	#REF!	201.241
	WEDNESDAY	One Bread Spaghetti. Whole-wheat. Bread with Tub Margarine. Side Salad with Vinaigrette Dressing. Low fat Milk.	Spaghetti	Beef	300 g	300	0.3	2	0.15	12932.8	524.733	733.071	14190.6	#REF!	2128.59
				Onion	1 unit	110	0.11	2	0.055	53.3104	74.1469	31.8278	159.285	#REF!	8.76068
				Water	3,5 cups	829.5	0.8295	2	0.41475	0	0	0	0	#REF!	0
				Oregano	2 spoons	10	0.01	2	0.005	74.7639	29.5279	197.437	301.729	#REF!	1.50864
				Sugar	1 spoon	20	0.02	2	0.01	1480.64	212.518	109.902	1803.06	#REF!	18.0306
				Garlic powder	1/2 spoon	1.5	0.0015	2	0.00075	447.034	714.595	297.051	1458.68	#REF!	1.09401
				Romero	1/2 spoon	5	0.005	2	0.0025	74.7639	29.5279	197.437	301.729	#REF!	0.754321
				Pepper	1 spoon	5	0.005	2	0.0025	6759.63	291.794	666.723	7718.15	#REF!	19.2954
				Olive oil	12 ml	11	0.011	2	0.0055	2174.56	2606.99	360.252	5141.81	#REF!	28.28
				Margarine	1 spoon	15	0.015	2	0.0075	3518.87	324.035	483.126	4326.03	#REF!	32.4453
				Spaghetti	3 cups	150	0.15	2	0.075	1891.66	92.9991	231.932	2216.59	#REF!	166.244
				Parmesan Cheese	1 spoon	28	0.028	2	0.014	3196.35	310.208	438.845	3945.41	#REF!	55.2357
			Tomato sauce	Olive oil	20 ml	18.4	0.0184	2	0.0092	2174.56	2606.99	360.252	5141.81	#REF!	47.3047
				Garlic	1 clove	5	0.005	2	0.0025	116.229	185.795	77.2332	379.257	#REF!	0.948142
				Onion	1/2 unit	55	0.055	2	0.0275	53.3104	74.1469	31.8278	159.285	#REF!	4.38034
				Tomatoes	475 g	475	0.475	2	0.2375	30.961	74.3575	21.742	127.06	#REF!	30.1769
				Pasta de Tomato	3 spoons	50	0.05	2	0.025	123.844	297.43	86.9679	508.242	#REF!	12.706
				Pepper	1 spoon	5	0.005	2	0.0025	6759.63	291.794	666.723	7718.15	#REF!	19.2954
				Leaf of laurel	1 spoon	1.8	0.0018	2	0.0009	0	0	0	0	#REF!	0
				Oregano	1 spoon	5	0.005	2	0.0025	74.7639	29.5279	197.437	301.729	#REF!	0.754321
			Side Salad	Lettuce	40 g	40	0.04	1	0.04	29.5416	42.4175	40.9073	112.866	#REF!	4.51465
				Tomato	1 unit	150	0.15	1	0.15	30.961	74.3575	21.742	127.06	#REF!	19.0591
				Cucumber	1/2 unit	140	0.14	1	0.14	185.699	141.925	95.472	423.096	#REF!	59.2334
			Vinaigrette dressing	Vegetal oil	1 spoon	18	0.018	1	0.018	5318.85	39.116	711.853	6069.82	#REF!	109.257
				Vinegar	1/2 spoon	7.5	0.0075	1	0.0075	139.067	243.757	101.379	484.203	#REF!	3.63152
				Sugar	1/16 spoon	1.25	0.00125	1	0.00125	1480.64	212.518	109.902	1803.06	#REF!	2.25382
				Pepper	1 spoon	5	0.005	1	0.005	6759.63	291.794	666.723	7718.15	#REF!	38.5908
				Dried herbs	1/2 spoon	5	0.005	1	0.005	74.7639	29.5279	197.437	301.729	#REF!	1.50864
			Mustard	Mustard powder	1 cup	101	0.101	10	0.0101	2155.51	0	638.81	2794.32	#REF!	28.2226
				White vinegar	2/3 cup	179.52	0.17952	10	0.017952	1100.69	133.339	371.825	1605.85	#REF!	28.8282
				Honey	1/3 cup	113	0.113	10	0.0113	0	0	0	0	#REF!	0
			Bread with Tub Margarine	Bread	1 unit	28	0.028	1	0.028	1644.92	80.8688	201.68	1927.47	#REF!	53.9692
				Margarine	1 spoon	15	0.015	1	0.015	3518.87	324.035	483.126	4326.03	#REF!	64.8905
			Low fat milk	Low fat milk	1 cup	245	0.245	1	0.245	668.136	61.5251	91.7321	821.394	#REF!	201.241
	THURSDAY	Green Salad with Tuna and Vinaigrette Dressing. Whole-wheat Bread with Tub Margarine. Shake-A-Pudding. Low fat Milk.	Green Salad with Tuna	Lettuce	56 g	56	0.056	1	0.056	29.5416	42.4175	40.9073	112.866	#REF!	6.32052
				Carrots	27,5 g	27.5	0.0275	1	0.0275	65.209	19.9602	39.1268	124.296	#REF!	3.41814
				Tuna	3 ounces (1 can)	85	0.085	1	0.085	0	0	0	0	#REF!	0
			Vinaigrette dressing	Vegetal oil	1,5 spoons	22.5	0.0225	1	0.0225	5318.85	39.116	711.853	6069.82	#REF!	136.571
				Vinegar	1/2 spoon	7.5	0.0075	1	0.0075	139.067	243.757	101.379	484.203	#REF!	3.63152
				Sugar	1/8 spoon	2.5	0.0025	1	0.0025	1480.64	212.518	109.902	1803.06	#REF!	4.50764
				Pepper	1 spoon	5	0.005	1	0.005	6759.63	291.794	666.723	7718.15	#REF!	38.5908
				Dried herbs	1/2 spoon	5	0.005	1	0.005	74.7639	29.5279	197.437	301.729	#REF!	1.50864
			Mustard	Mustard powder	1 cup	101	0.101	10	0.0101	2155.51	0	638.81	2794.32	#REF!	28.2226
				White vinegar	2/3 cup	179.52	0.17952	10	0.017952	1100.69	133.339	371.825	1605.85	#REF!	28.8282
				Honey	1/3 cup	113	0.113	10	0.0113	0	0	0	0	#REF!	0
			Whole-wheat Bread with Tub Margarine	Bread	1 unit	28	0.028	1	0.028	1644.92	80.8688	201.68	1927.47	#REF!	53.9692
				Margarine	1 spoon	15	0.015	1	0.015	3518.87	324.035	483.126	4326.03	#REF!	64.8905
			Shake-A-Pudding	Sugar	1/3 cup	66.6	0.0666	5	0.01332	1480.64	212.518	109.902	1803.06	#REF!	24.0167
				Milk	2 1/4 cups	553.5	0.5535	5	0.1107	1202.65	110.745	165.118	1478.51	#REF!	163.671
				Egg yolk	3 units	51	0.051	5	0.0102	1205.87	135.436	229.547	1570.86	#REF!	16.0228
				Flour de Maize	2 spoons	30	0.03	5	0.006	535.696	64.895	180.965	781.556	#REF!	4.68933
				Butter	3 spoons	45	0.045	5	0.009	3518.87	324.035	483.126	4326.03	#REF!	38.9343
				Vanilla	2 spoons	8	0.008	5	0.0016	132320	64764.8	782.258	197867	#REF!	316.588
			Low fat milk	Low fat milk	1 cup	245	0.245	1	0.245	668.136	61.5251	91.7321	821.394	#REF!	201.241
	FRIDAY	Peanut Butter and Banana Sandwich. Celery Sticks. Low fat Milk.	Banana Sandwich	Banana	1 unit	118	0.118	1	0.118	371.665	314.794	75.5526	762.011	#REF!	89.9173
				Bread	2 units	56	0.056	1	0.056	1644.92	80.8688	201.68	1927.47	#REF!	107.938
			Peanut Butter	Peanuts	2 cups	292	0.292	4	0.073	249.477	111.345	164.446	525.268	#REF!	38.3445
				Peanut oil	1 cup	145	0.145	4	0.03625	5318.85	39.116	711.853	6069.82	#REF!	220.031
				Honey	4 spoons	40	0.04	4	0.01	0	0	0	0	#REF!	0
				Cinnamon	2 spoons	4	0.004	4	0.001	11986.7	0	740.35	12727.1	#REF!	12.7271
				Chocolate chips	4 spoons	50	0.05	4	0.0125	16492.3	0	166.086	16658.4	#REF!	208.23
			Celery Sticks	Celery	60 g	60	0.06	1	0.06	65.209	19.9602	39.1268	124.296	#REF!	7.45776
			Low fat milk	Low fat milk	1 cup	245	0.245	1	0.245	668.136	61.5251	91.7321	821.394	#REF!	201.241
	SATURDAY	Crunchy Chicken Salad Sandwich. Carrot Sticks. Orange. Low fat Milk.	Crunchy Chicken Salad Sandwich	Bread	2 units	56	0.056	1	0.056	1644.92	80.8688	201.68	1927.47	#REF!	107.938
				Lettuce	1 hoja	8	0.008	1	0.008	29.5416	42.4175	40.9073	112.866	#REF!	0.902931
				Chicken	280 g	260	0.26	5	0.052	1347.68	135.852	236.024	1719.56	#REF!	89.417
				Celery	60 g	60	0.06	5	0.012	65.209	19.9602	39.1268	124.296	#REF!	1.49155
				Onion	40 g	40	0.04	5	0.008	53.3104	74.1469	31.8278	159.285	#REF!	1.27428
				Red pepper	37,25 g	37.25	0.03725	5	0.00745	94.5723	96.6315	58.2112	249.415	#REF!	1.85814
				Cucumber	59,5 g	59.5	0.0595	5	0.0119	185.699	141.925	95.472	423.096	#REF!	5.03484
				Grapes	80 g	80	0.08	5	0.016	205.601	57.4884	39.6227	302.712	#REF!	4.84339
				Apple	1 unit	138	0.138	5	0.0276	148.328	243.891	54.4193	446.638	#REF!	12.3272
				Yogurt	1 unit	125	0.125	5	0.025	751.653	69.2158	103.199	924.068	#REF!	23.1017
			Carrot Sticks	Carrots	55 g	55	0.055	1	0.055	65.209	19.9602	39.1268	124.296	#REF!	6.83628
			Ranch dressing	Buttermilk	1 cup	245	0.245	10	0.0245	1013.3	93.3095	139.122	1245.73	#REF!	30.5204
				Parsley	3 spoons	30	0.03	10	0.003	3099.35	125.297	344.369	3569.02	#REF!	10.7071
				Onion	1 unit	12	0.012	10	0.0012	53.3104	74.1469	31.8278	159.285	#REF!	0.191142
				Lemon	2 units	116	0.116	10	0.0116	251.419	52.3962	44.7845	348.6	#REF!	4.04376
				Garlic	1 clove	5	0.005	10	0.0005	116.229	185.795	77.2332	379.257	#REF!	0.189628
				Pepper	1 spoon	5	0.005	10	0.0005	6759.63	291.794	666.723	7718.15	#REF!	3.85908
			Sour cream	Milk cream	2 cups	484	0.484	4	0.121	1013.3	93.3095	139.122	1245.73	#REF!	150.733
				Buttermilk	2 spoons	30.6	0.0306	4	0.00765	1013.3	93.3095	139.122	1245.73	#REF!	9.52984
			Orange	Orange	1 unit	131	0.131	1	0.131	231.437	57.3139	43.0271	331.778	#REF!	43.4629
			Low fat milk	Low fat milk	1 cup	245	0.245	1	0.245	668.136	61.5251	91.7321	821.394	#REF!	201.241
	SUNDAY	Lentil Stew. Brown Rice. Whole-Wheat Bread with Tub Margarine. Low fat Milk	Lentil Stew	Olive oil	2 spoons	28	0.028	5	0.0056	2174.56	2606.99	360.252	5141.81	#REF!	28.7941
				Onion	1 unit	110	0.11	5	0.022	53.3104	74.1469	31.8278	159.285	#REF!	3.50427
				Garlic powder	1 spoon	3	0.003	5	0.0006	447.034	714.595	297.051	1458.68	#REF!	0.875208
				Carrots (frozen)	1 packet	453.6	0.4536	5	0.09072	65.209	19.9602	39.1268	124.296	#REF!	11.2761
				Lentils	1 packet	453.6	0.4536	5	0.09072	1781.76	0	7735.63	9517.39	#REF!	863.417
				Tomatoes	800 g	800	0.8	5	0.16	30.961	74.3575	21.742	127.06	#REF!	20.3297
				Water	3 cups	711	0.711	5	0.1422	0	0	0	0	#REF!	0
				Green pepper powder	1 spoon	3	0.003	5	0.0006	94.5723	96.6315	58.2112	249.415	#REF!	0.149649
			Whole-wheat Bread with Tub Margarine	Bread	1 unit	28	0.028	1	0.028	1644.92	80.8688	201.68	1927.47	#REF!	53.9692
				Margarine	1 spoon	15	0.015	1	0.015	3518.87	324.035	483.126	4326.03	#REF!	64.8905
			Brown Rice	Rice	1/3 cup	65	0.065	1	0.065	609.601	1221.83	267.591	2099.02	#REF!	136.437
				Water	5/6 cups	197.5	0.1975	1	0.1975	0	0	0	0	#REF!	0
			Low fat milk	Low fat milk	1 cup	245	0.245	1	0.245	668.136	61.5251	91.7321	821.394	#REF!	201.241
	DINNER												0	0	0
	MONDAY	Honey Lemon Chicken. Brown Rice Pilaf. Peas and Corn with Tub Margarine. Chocolate Chip Cookie Yogurtt. Low fat Milk.	Honey Lemon Chicken	Vegetal oil	4 spoons	72	0.072	4	0.018	5318.85	39.116	711.853	6069.82	#REF!	109.257
				Chicken	2 pounds	910	0.91	4	0.2275	1347.68	135.852	236.024	1719.56	#REF!	391.199
				Flour	1/2 cup	57.5	0.0575	4	0.014375	1891.66	92.9991	231.932	2216.59	#REF!	31.8635
				Honey	1/4 cup	84.75	0.08475	4	0.0211875	0	0	0	0	#REF!	0
				Lemon	2 units	116	0.116	4	0.029	251.419	52.3962	44.7845	348.6	#REF!	10.1094
			Brown Rice Pilaf	Rice	1/2 cup	97.5	0.0975	2	0.04875	609.601	1221.83	267.591	2099.02	#REF!	102.327
				Water	3 cups	711	0.711	2	0.3555	0	0	0	0	#REF!	0
				Almonds	1/4 cup	72	0.072	2	0.036	2342.15	4075.02	6638.07	13055.2	#REF!	469.989
				Butter	1 spoon	15	0.015	2	0.0075	3518.87	324.035	483.126	4326.03	#REF!	32.4453
				Parsley	1 spoon	10	0.01	2	0.005	3099.35	125.297	344.369	3569.02	#REF!	17.8451
				Garlic powder	1 spoon	3	0.003	2	0.0015	447.034	714.595	297.051	1458.68	#REF!	2.18802
				Pepper	1 spoon	5	0.005	2	0.0025	6759.63	291.794	666.723	7718.15	#REF!	19.2954
			Peas and Corn with Tub Margarine	Maize	1 can	432	0.432	4	0.108	522.429	63.2878	176.483	762.2	#REF!	82.3176
				Green peas (frozen)	1 can	425	0.425	4	0.10625	356.396	159.064	234.923	750.382	#REF!	79.7281
				Margarine	1 spoon	15	0.015	4	0.00375	3518.87	324.035	483.126	4326.03	#REF!	16.2226
			Chocolate Chip Cookie Yogurtt	Sugar	1/2 cup	100	0.1	12	0.00833333	1480.64	212.518	109.902	1803.06	#REF!	15.0255
				Brown sugar	1/2 cup	110	0.11	12	0.00916667	1384.39	198.705	102.758	1685.86	#REF!	15.4537
				Margarine	3 spoons	45	0.045	12	0.00375	3518.87	324.035	483.126	4326.03	#REF!	16.2226
				Yogurt	1 unit	125	0.125	12	0.0104167	751.653	69.2158	103.199	924.068	#REF!	9.62571
				Vanilla	7 g	7	0.007	12	0.000583333	132320	64764.8	782.258	197867	#REF!	115.423
				Flour	1 1/3 cup	153	0.153	12	0.01275	1891.66	92.9991	231.932	2216.59	#REF!	28.2615
				Bicarbonate	1/2 spoon	2.5	0.0025	12	0.000208333	0	0	0	0	#REF!	0
				Chocolate chips	225 g	225	0.225	12	0.01875	16492.3	0	166.086	16658.4	#REF!	312.344
			Low fat milk	Low fat milk	1 cup	245	0.245	1	0.245	668.136	61.5251	91.7321	821.394	#REF!	201.241
	TUESDAY	One Bread Spaghetti. Steamed Broccoli with Tub Margarine. White Roll with Tub Margarine. Shake-A-Pudding. Low fat Milk.	Spaghetti	Beef	300 g	300	0.3	2	0.15	12932.8	524.733	733.071	14190.6	#REF!	2128.59
				Onion	1 unit	110	0.11	2	0.055	53.3104	74.1469	31.8278	159.285	#REF!	8.76068
				Water	3,5 cups	829.5	0.8295	2	0.41475	0	0	0	0	#REF!	0
				Oregano	2 spoons	10	0.01	2	0.005	74.7639	29.5279	197.437	301.729	#REF!	1.50864
				Sugar	1 spoon	20	0.02	2	0.01	1480.64	212.518	109.902	1803.06	#REF!	18.0306
				Garlic powder	1/2 spoon	1.5	0.0015	2	0.00075	447.034	714.595	297.051	1458.68	#REF!	1.09401
				Romero	1/2 spoon	5	0.005	2	0.0025	74.7639	29.5279	197.437	301.729	#REF!	0.754321
				Pepper	1 spoon	5	0.005	2	0.0025	6759.63	291.794	666.723	7718.15	#REF!	19.2954
				Olive oil	12 ml	11	0.011	2	0.0055	2174.56	2606.99	360.252	5141.81	#REF!	28.28
				Margarine	1 spoon	15	0.015	2	0.0075	3518.87	324.035	483.126	4326.03	#REF!	32.4453
				Spaghetti	3 cups	150	0.15	2	0.075	1891.66	92.9991	231.932	2216.59	#REF!	166.244
				Parmesan cheese	1 spoon	28	0.028	2	0.014	3196.35	310.208	438.845	3945.41	#REF!	55.2357
			Tomato sauce	Olive oil	20 ml	18.4	0.0184	2	0.0092	2174.56	2606.99	360.252	5141.81	#REF!	47.3047
				Garlic	1 clove	5	0.005	2	0.0025	116.229	185.795	77.2332	379.257	#REF!	0.948142
				Onion	1/2 unit	55	0.055	2	0.0275	53.3104	74.1469	31.8278	159.285	#REF!	4.38034
				Tomatoes	475 g	475	0.475	2	0.2375	30.961	74.3575	21.742	127.06	#REF!	30.1769
				Pasta de Tomato	3 spoons	50	0.05	2	0.025	123.844	297.43	86.9679	508.242	#REF!	12.706
				Pepper	1 spoon	5	0.005	2	0.0025	6759.63	291.794	666.723	7718.15	#REF!	19.2954
				Leaf of laurel	1 spoon	1.8	0.0018	2	0.0009	0	0	0	0	#REF!	0
				Oregano	1 spoon	5	0.005	2	0.0025	74.7639	29.5279	197.437	301.729	#REF!	0.754321
			Steamed Broccoli with Tub Margarine	Broccoli (frozen)	92 g	92	0.092	1	0.092	161.21	81.5517	83.0555	325.817	#REF!	29.9752
				Margarine	1 spoon	15	0.015	1	0.015	3518.87	324.035	483.126	4326.03	#REF!	64.8905
			White Roll with Tub Margarine	Bread	1 unit	57	0.057	1	0.057	1644.92	80.8688	201.68	1927.47	#REF!	109.866
				Margarine	1 spoon	15	0.015	1	0.015	3518.87	324.035	483.126	4326.03	#REF!	64.8905
			Shake-A-Pudding.	Sugar	1/3 cup	66.6	0.0666	5	0.01332	1480.64	212.518	109.902	1803.06	#REF!	24.0167
				Milk	2 1/4 cups	553.5	0.5535	5	0.1107	1202.65	110.745	165.118	1478.51	#REF!	163.671
				Egg yolk	3 units	51	0.051	5	0.0102	1205.87	135.436	229.547	1570.86	#REF!	16.0228
				Flour de Maize	2 spoons	30	0.03	5	0.006	535.696	64.895	180.965	781.556	#REF!	4.68933
				Butter	3 spoons	45	0.045	5	0.009	3518.87	324.035	483.126	4326.03	#REF!	38.9343
				Vanilla	2 spoons	8	0.008	5	0.0016	132320	64764.8	782.258	197867	#REF!	316.588
			Low fat milk	Low fat milk	1 cup	245	0.245	1	0.245	668.136	61.5251	91.7321	821.394	#REF!	201.241
	WEDNESDAY	Polenta with Pepper and Cheese. Green Beans with Tub Margarine. Chocolate Chip Yogurtt Cookie. Low fat Milk.	Polenta with Pepper and Cheese	Water	4 cups	948	0.948	8	0.1185	0	0	0	0	#REF!	0
				Flour de Maize	1,5 cups	175.5	0.1755	8	0.0219375	535.696	64.895	180.965	781.556	#REF!	17.1454
				Maize	1 unit	77	0.077	8	0.009625	522.429	63.2878	176.483	762.2	#REF!	7.33618
				Red pepper	1 unit	119	0.119	8	0.014875	94.5723	96.6315	58.2112	249.415	#REF!	3.71005
				Green peppers	1 can	198.5	0.1985	8	0.0248125	94.5723	96.6315	58.2112	249.415	#REF!	6.18861
				Margarine	2 spoon	30	0.03	8	0.00375	3518.87	324.035	483.126	4326.03	#REF!	16.2226
				Cheese cheddar	6 ounces	168	0.168	8	0.021	3196.35	310.208	438.845	3945.41	#REF!	82.8536
				Coriander	1 spoon	2	0.002	8	0.00025	3099.35	125.297	344.369	3569.02	#REF!	0.892254
				Kidney beans	20 ounces	567	0.567	8	0.070875	1216.29	427.896	6140.53	7784.71	#REF!	551.742
				Red pepper	1,5 units	223.5	0.2235	8	0.0279375	94.5723	96.6315	58.2112	249.415	#REF!	6.96803
			Green Beans with Tub Margarine	Green peas (frozen)	160 g	160	0.16	1	0.16	356.396	159.064	234.923	750.382	#REF!	120.061
				Margarine	1 spoon	15	0.015	1	0.015	3518.87	324.035	483.126	4326.03	#REF!	64.8905
			Chocolate Chip Yogurt Cookie	Sugar	1/2 cup	100	0.1	12	0.00833333	1480.64	212.518	109.902	1803.06	#REF!	15.0255
				Brown sugar	1/2 cup	110	0.11	12	0.00916667	1384.39	198.705	102.758	1685.86	#REF!	15.4537
				Margarine	3 spoons	45	0.045	12	0.00375	3518.87	324.035	483.126	4326.03	#REF!	16.2226
				Yogurt	1 unit	125	0.125	12	0.0104167	751.653	69.2158	103.199	924.068	#REF!	9.62571
				Vanilla	7 g	7	0.007	12	0.000583333	132320	64764.8	782.258	197867	#REF!	115.423
				Flour	1 1/3 cup	153	0.153	12	0.01275	1891.66	92.9991	231.932	2216.59	#REF!	28.2615
				Bicarbonate	1/2 spoon	2.5	0.0025	12	0.000208333	0	0	0	0	#REF!	0
				Chocolate chips	225 g	225	0.225	12	0.01875	16492.3	0	166.086	16658.4	#REF!	312.344
			Low fat milk	Low fat milk	1 cup	245	0.245	1	0.245	668.136	61.5251	91.7321	821.394	#REF!	201.241
	THURSDAY	Marinated Beef. Mashed Potatoes with Tub Margarine. Mixed Vegetables with Tub Margarine. Water.	Marinated Beef	Beef	12 ounces	340	0.34	2	0.17	12932.8	524.733	733.071	14190.6	#REF!	2412.4
				Garlic	1 clove	5	0.005	2	0.0025	116.229	185.795	77.2332	379.257	#REF!	0.948142
				Lemon	1 unit	58	0.058	2	0.029	251.419	52.3962	44.7845	348.6	#REF!	10.1094
				Pepper	1 spoon	5	0.005	2	0.0025	6759.63	291.794	666.723	7718.15	#REF!	19.2954
				Vegetal oil	4 spoons	72	0.072	2	0.036	5318.85	39.116	711.853	6069.82	#REF!	218.514
			Mashed Potatoes with Tub Margarine	Low fat milk	3 spoons	45	0.045	1	0.045	668.136	61.5251	91.7321	821.394	#REF!	36.9627
				Potatoes	285 g	285	0.285	1	0.285	49.3531	88.7969	259.97	398.12	#REF!	113.464
				Margarine	2 spoons	30	0.03	1	0.03	3518.87	324.035	483.126	4326.03	#REF!	129.781
			Mixed Vegetables with Tub Margarine	Vegetable mix(frozen)	186 g	186	0.186	1	0.186	38.7766	45.5221	24.0154	108.314	#REF!	20.1464
				Margarine	1 spoon	15	0.015	1	0.015	3518.87	324.035	483.126	4326.03	#REF!	64.8905
			Water	Water	8 ounces	237	0.237	1	0.237	0	0	0	0	#REF!	0
	FRIDAY	Mouth-Watering Oven-Fried Fish. Cuoscous with Peas and Onions. Green Beans. White Roll with Tub Margarine. Water. Coffee.	Mouth-Watering Oven-Fried Fish.	Fish filet	2 pounds	906	0.906	6	0.151	0	0	0	0	#REF!	0
				Flour	140 g	140	0.14	6	0.0233333	1891.66	92.9991	231.932	2216.59	#REF!	51.7205
				Buttermilk semi-skimmed	1/4 cup	61.25	0.06125	6	0.0102083	1013.3	93.3095	139.122	1245.73	#REF!	12.7168
				Garlic	10 g	10	0.01	6	0.00166667	116.229	185.795	77.2332	379.257	#REF!	0.632094
				Pepper	1 spoon	5	0.005	6	0.000833333	6759.63	291.794	666.723	7718.15	#REF!	6.43179
				Onion powder	1/4 spoon	0.5	0.0005	6	8.33333e-05	53.3104	74.1469	31.8278	159.285	#REF!	0.0132738
				Maize	155 g	155	0.155	6	0.0258333	522.429	63.2878	176.483	762.2	#REF!	19.6902
				Vegetal oil	535ml	492	0.492	6	0.082	5318.85	39.116	711.853	6069.82	#REF!	497.726
				Lemon	2 units	116	0.116	6	0.0193333	251.419	52.3962	44.7845	348.6	#REF!	6.7396
			Spicy sauce	Tomatoes	400 g	400	0.4	8	0.05	30.961	74.3575	21.742	127.06	#REF!	6.35302
				Green peppers	1 can	198.5	0.1985	8	0.0248125	94.5723	96.6315	58.2112	249.415	#REF!	6.18861
				Onion	12 units	144	0.144	8	0.018	53.3104	74.1469	31.8278	159.285	#REF!	2.86713
				Coriander	1/2 cup	16	0.016	8	0.002	3099.35	125.297	344.369	3569.02	#REF!	7.13803
				White vinegar	1 spoon	17	0.017	8	0.002125	1100.69	133.339	371.825	1605.85	#REF!	3.41243
				Pepper	2 spoons	10	0.01	8	0.00125	6759.63	291.794	666.723	7718.15	#REF!	9.64769
				Lima	1 unit	58	0.058	8	0.00725	251.419	52.3962	44.7845	348.6	#REF!	2.52735
				Sugar	1 spoon	20	0.02	8	0.0025	1480.64	212.518	109.902	1803.06	#REF!	4.50764
				Soya sauce	2 spoons	32	0.032	8	0.004	445.813	26.3899	2.7415	474.945	#REF!	1.89978
			Cuoscous with Peas and Onions	Onion	1 cup	160	0.16	4	0.04	53.3104	74.1469	31.8278	159.285	#REF!	6.37141
				Salvia	1/2 spoon	5	0.005	4	0.00125	74.7639	29.5279	197.437	301.729	#REF!	0.377161
				Olive oil	1 spoon	14	0.014	4	0.0035	2174.56	2606.99	360.252	5141.81	#REF!	17.9963
				Water	1 1/3 cups	315.2	0.3152	4	0.0788	0	0	0	0	#REF!	0
				Green peas	1 can	425	0.425	4	0.10625	356.396	159.064	234.923	750.382	#REF!	79.7281
				Cuoscous	240 g	240	0.24	4	0.06	1891.66	92.9991	231.932	2216.59	#REF!	132.995
			White Roll with Tub Margarine	Bread	1 unit	57	0.057	1	0.057	1644.92	80.8688	201.68	1927.47	#REF!	109.866
				Margarine	1 spoon	15	0.015	1	0.015	3518.87	324.035	483.126	4326.03	#REF!	64.8905
			Green Beans	Frozen green beans	1 cup	135	0.135	1	0.135	463.115	191.3	413.924	1068.34	#REF!	144.226
			Water	Water	8 ounces	237	0.237	1	0.237	0	0	0	0	#REF!	0
			Coffee	Coffee	2,5 spoons	45	0.045	1	0.045	7877.22	0	7826.29	15703.5	#REF!	706.658
				Water	8 ounces	237	0.237	1	0.237	0	0	0	0	#REF!	0
	SATURDAY	Lentil Stew. Brown Rice. Broccoli with Tub Margarine. Canned Pears. Water.	Lentil Stew	Olive oil	2 spoons	28	0.028	5	0.0056	2174.56	2606.99	360.252	5141.81	#REF!	28.7941
				Onion	1 unit	110	0.11	5	0.022	53.3104	74.1469	31.8278	159.285	#REF!	3.50427
				Garlic powder	1 spoon	3	0.003	5	0.0006	447.034	714.595	297.051	1458.68	#REF!	0.875208
				Carrots(frozen)	1 packet	453.6	0.4536	5	0.09072	65.209	19.9602	39.1268	124.296	#REF!	11.2761
				Lentils	1 packet	453.6	0.4536	5	0.09072	1781.76	0	7735.63	9517.39	#REF!	863.417
				Tomatoes	800 g	800	0.8	5	0.16	30.961	74.3575	21.742	127.06	#REF!	20.3297
				Water	3 cups	711	0.711	5	0.1422	0	0	0	0	#REF!	0
				Green pepper powder	1 spoon	3	0.003	5	0.0006	94.5723	96.6315	58.2112	249.415	#REF!	0.149649
			Brown Rice	Rice	1/3 cup	65	0.065	1	0.065	609.601	1221.83	267.591	2099.02	#REF!	136.437
				Water	5/6 cups	196.7	0.1967	1	0.1967	0	0	0	0	#REF!	0
			Broccoli with Tub Margarine	Broccoli (frozen)	184 g	184	0.184	1	0.184	161.21	81.5517	83.0555	325.817	#REF!	59.9503
				Margarine	1 spoon	15	0.015	1	0.015	3518.87	324.035	483.126	4326.03	#REF!	64.8905
			Canned Pears	Pears	133 g	133	0.133	1	0.133	126.677	188.321	44.5023	359.5	#REF!	47.8135
			Water	Water	8 ounces	237	0.237	1	0.237	0	0	0	0	#REF!	0
	SUNDAY	Bread-fried Pork Chop. Baked Potato. Cabbage Slaw with Vinaigrette Dressing. Apple Juice.	Bread-fried Pork Chop	Pepper	1 spoon	5	0.005	2	0.0025	6759.63	291.794	666.723	7718.15	#REF!	19.2954
				Pork Chop	2 units	340	0.34	2	0.17	4101.85	645.002	760.644	5507.5	#REF!	936.275
				Flour	1 cup	115	0.115	2	0.0575	1891.66	92.9991	231.932	2216.59	#REF!	127.454
				Pepper	1 spoon	5	0.005	2	0.0025	6759.63	291.794	666.723	7718.15	#REF!	19.2954
				Vegetal oil	1 spoon	18	0.018	2	0.009	5318.85	39.116	711.853	6069.82	#REF!	54.6284
				Butter	1 spoon	15	0.015	2	0.0075	3518.87	324.035	483.126	4326.03	#REF!	32.4453
			Baked Potato	Potato	1 unit	202	0.202	1	0.202	49.3531	88.7969	259.97	398.12	#REF!	80.4202
			Sauce	Tomatoes	475 g	475	0.475	2	0.2375	30.961	74.3575	21.742	127.06	#REF!	30.1769
				Red pepper	1 unit	119	0.119	2	0.0595	94.5723	96.6315	58.2112	249.415	#REF!	14.8402
				Onion	1 unit	110	0.11	2	0.055	53.3104	74.1469	31.8278	159.285	#REF!	8.76068
				Coriander	8 g	8	0.008	2	0.004	3099.35	125.297	344.369	3569.02	#REF!	14.2761
				Lime juice	1 unit	58	0.058	2	0.029	251.419	52.3962	44.7845	348.6	#REF!	10.1094
				Pepper	6,5 g	6.5	0.0065	2	0.00325	94.5723	96.6315	58.2112	249.415	#REF!	0.810599
				Cumin powder	1 spoon	114	0.114	2	0.057	74.7639	29.5279	197.437	301.729	#REF!	17.1985
				Pepper	1 spoon	5	0.005	2	0.0025	6759.63	291.794	666.723	7718.15	#REF!	19.2954
			Cabbage Slaw	Cabbage	70 g	70	0.07	1	0.07	122.841	118.604	59.7915	301.237	#REF!	21.0866
			Vinaigrette dressing	Vegetal oil	1,5 spoons	22.5	0.0225	1	0.0225	5318.85	39.116	711.853	6069.82	#REF!	136.571
				Vinegar	1/2 spoon	7.5	0.0075	1	0.0075	139.067	243.757	101.379	484.203	#REF!	3.63152
				Sugar	1/8 spoon	2.5	0.0025	1	0.0025	1480.64	212.518	109.902	1803.06	#REF!	4.50764
				Pepper	1 spoon	5	0.005	1	0.005	6759.63	291.794	666.723	7718.15	#REF!	38.5908
				Dried herbs	1/2 spoon	5	0.005	1	0.005	74.7639	29.5279	197.437	301.729	#REF!	1.50864
			Mustard	Mustard powder	1 cup	101	0.101	10	0.0101	2155.51	0	638.81	2794.32	#REF!	28.2226
				White vinegar	2/3 cup	179.52	0.17952	10	0.017952	1100.69	133.339	371.825	1605.85	#REF!	28.8282
				Honey	1/3 cup	113	0.113	10	0.0113	0	0	0	0	#REF!	0
			Apple Juice	Apple Juice	1 cup	248	0.248	1	0.248	206.011	338.737	75.5823	620.33	#REF!	153.842
														#REF!	39318.6
															5616.95
