# Supplementary material
Source: MDPI journal article supplement (https://www.mdpi.com/2073-4441/8/10/448)
Supplement: s4 [file s4]

## Sheet: USDAr-Menu2
	Day	Recipe	Dishes	Products	Quantity	Grams	Kilograms	Servings	Kg/person
	BREAKFAST
	MONDAY	Raisin Oatmeal. Low fat Milk. Banana with Peanut Butter.	Raisin Oatmeal	Oat	1/2 cup	117	0.117	1	0.117
				Water	1 cup	237	0.237	1	0.237
				Raisins	1 spoon	9.06	0.00906	1	0.00906
			Banana with Peanut Butter	Peanuts	2 cups	292	0.292	4	0.073
				Peanut oil	1 cup	145	0.145	4	0.03625
				Honey	4 spoons	40	0.04	4	0.01
				Cinnamon	4 spoons	8	0.008	4	0.002
				Chocolate chips	4 spoons	50	0.05	4	0.0125
				Banana	1 unit	118	0.118	1	0.118
			Low fat milk	Low fat milk	1 cup	245	0.245	1	0.245
	TUESDAY	Sausage Omelet. Hash Brown Potatoes. Orange Juice.	Sausage Omelet	Vegetal oil	1 spoon	18	0.018	1	0.018
				Turkey sausage	2 units	114	0.114	1	0.114
				Cheddar cheese	28,35 g	28.25	0.02825	1	0.02825
				Low fat milk	1/2 cup	122	0.122	1	0.122
				Eggs	2 units	88	0.088	1	0.088
			Hash Brown Potatoes	Vegetal oil	4 spoons	72	0.072	1	0.072
				Potatoes (frozen)	1/2 unit	91	0.091	1	0.091
			Orange juice	Oranges	3 units	393	0.393	1	0.393
	WEDNESDAY	Cold Cereal with Banana and Low fat Milk. Whole-wheat Toast with Peanut Butter. Coffee.	Cold Cereal with Banana and Low fat Milk	Low fat milk	3/4 cup	183	0.183	1	0.183
				Banana	1 unit	118	0.118	1	0.118
				Oat	1 cup	234	0.234	1	0.234
			Whole-wheat Toast with Peanut Butter	Peanuts	2 cups	292	0.292	4	0.073
				Peanut oil	1 cup	145	0.145	4	0.03625
				Honey	4 spoons	40	0.04	4	0.01
				Cinnamon	4 spoons	8	0.008	4	0.002
				Chocolate chips	4 spoon	50	0.05	4	0.0125
				Bread	1 unit	28	0.028	1	0.028
			Coffee	Coffee	2,5 spoons	45	0.045	1	0.045
				Water	8 ounces	237	0.237	1	0.237
	THURSDAY	Breakfast Burrito with Salsa. Whole-wheat Toast with Tub Margarine and Jelly. Apple Juice.	Burrito	Eggs	4 units	352	0.352	4	0.088
				Maize	2 spoons	26.25	0.02625	4	0.0065625
				Low fat milk	1 spoon	15.25	0.01525	4	0.0038125
				Red pepper	1 unit	149	0.149	4	0.03725
				Onion	1/2 unit	55	0.055	4	0.01375
				Garlic powder	1/4 spoon	0.75	0.00075	4	0.0001875
				Flour	1 unit	32	0.032	1	0.032
			Mustard	Mustard powder	1 cup	100.8	0.1008	10	0.01008
				White vinegar	2/3 cup	179.52	0.17952	10	0.017952
				Honey	1/3 cup	113	0.113	10	0.0113
			Rapeseed oil	Rapeseed oil	1 spoon	18	0.018	1	0.018
			Salsa	Tomatoes	475 g	475	0.475	2	0.2375
				Red pepper	1 unit	119	0.119	2	0.0595
				Onion	1 unit	110	0.11	2	0.055
				Coriander	8 g	8	0.008	2	0.004
				Lime juice	1 unit	58	0.058	2	0.029
				Pepper	6,5 g	6.5	0.0065	2	0.00325
				Cumin powder	1 spoon	114	0.114	2	0.057
				Pepper	1 spoon	5	0.005	2	0.0025
			Whole-wheat Toast with Tub Margarine	Bread	1 unit	28	0.028	1	0.028
				Margarine	2 spoons	30	0.03	1	0.03
			Grapes jelly	Grapes	125g	125	0.125	1	0.125
				Water	1/2 cup	118.5	0.1185	1	0.1185
				Sugar	75g	75	0.075	1	0.075
			Apple Juice	Apple Juice	1 cup	248	0.248	1	0.248
	FRIDAY	Toasted Oat Cereal. Scrambled Egg with Salsa. Apple Juice.	Toasted Oat Cereal	Oat	1 cup	234	0.234	1	0.234
				Low fat milk	3/4 cup	184	0.184	1	0.184
			Scrambled Egg with Salsa	Eggs	1 unit	44	0.044	1	0.044
				Low fat milk	1 spoon	15.25	0.01525	1	0.01525
				Vegetal oil	1 spoon	18	0.018	1	0.018
				Tomatoes	475 g	475	0.475	2	0.2375
				Red pepper	1 unit	119	0.119	2	0.0595
				Onion	1 unit	110	0.11	2	0.055
				Coriander	8 g	8	0.008	2	0.004
				Lime juice	1 unit	58	0.058	2	0.029
				Pepper	6,5 g	6.5	0.0065	2	0.00325
				Cumin powder	1 spoon	114	0.114	2	0.057
				Pepper	1 spoon	5	0.005	2	0.0025
			Apple Juice	Apple Juice	1 cup	248	0.248	1	0.248
	SATURDAY	Banana Walnut Oatmeal. Hard-boiled Eggs. Orange Juice.	Banana Walnut Oatmeal	Low fat milk powder	4 cups	980	0.98	4	0.245
				Water	2 3/4 cups	414	0.414	4	0.1035
				Oat	2 cups	468	0.468	4	0.117
				Bananas	2 units	236	0.236	4	0.059
				Walnuts	2 spoons	15	0.015	4	0.00375
			Maple syrup	Maple syrup	2 spoons	40	0.04	4	0.01
			Hard-boiled Egg	Eggs	1 unit	44	0.044	1	0.044
			Orange juice	Oranges	3 units	393	0.393	1	0.393
	SUNDAY	Perfect Pumpkin Breadcakes with Breadcake Syrup. Turkey Sausage Link. Banana. Apple Juice.	Pumpkin Breadcakes	Flour	2 cups	230	0.23	4	0.0575
				Brown sugar	2 spoons	18	0.018	4	0.0045
				Yeast powder	1 spoon	5	0.005	4	0.00125
				Eggs	1 unit	44	0.044	4	0.011
				Pumpkin	245 g	245	0.245	4	0.06125
				Low fat milk	1 cup	245	0.245	4	0.06125
				Vegetal oil	2 spoons	30	0.03	4	0.0075
			Maple syrup	Maple syrup	2 spoons	40	0.04	1	0.04
			Spices	Cinnamon powder	1 spoon	7.8	0.0078	2	0.0039
				Nutmeg powder	1/4 spoon	1.75	0.00175	2	0.000875
				Ginger	1/4 spoon	0.5	0.0005	2	0.00025
				Clove powder	1/8 spoon	1	0.001	2	0.0005
			Turkey Sausage Link	Turkey sausage	2 units	114	0.114	1	0.114
			Banana	Banana	1 unit	118	0.118	1	0.118
			Apple Juice	Apple Juice	1 cup	248	0.248	1	0.248
	MORNING SKACK
	MONDAY	Orange. Graham Crakers. Low fat Milk.	Orange	Orange	1 unit	131	0.131	1	0.131
			Graham Crakers	Flour	190 g	190	0.19	4	0.0475
				Yeast powder	1 spoon	5	0.005	4	0.00125
				Bicarbonate	1/2 spoon	2.5	0.0025	4	0.000625
				Milk	1/2 cup	122.5	0.1225	4	0.030625
				Margarine	1/2 cup	115	0.115	4	0.02875
				Brown sugar	1 cup	220	0.22	4	0.055
				Vanilla	1 spoon	4	0.004	4	0.001
				Honey	1/3 cup	113	0.113	4	0.02825
			Low fat milk	Low fat milk	1 cup	244	0.244	1	0.244
	TUESDAY	Peanut Butter on Banana. Low fat Milk.	Banana	Banana	1 unit	118	0.118	1	0.118
			Peanut Butte	Peanuts	2 cups	292	0.292	4	0.073
				Peanut oil	1 cup	145	0.145	4	0.03625
				Honey	4 spoons	40	0.04	4	0.01
				Cinnamon	4 spoon	8	0.008	4	0.002
				Chocolate chips	4 spoon	42	0.042	4	0.0105
			Low fat milk	Low fat milk	1 cup	244	0.244	1	0.244
	WEDNESDAY	Graham Crackers. Low fat Milk. .	Graham Crackers	Flour	190 g	190	0.19	4	0.0475
				Yeast powder	1 spoon	5	0.005	4	0.00125
				Bicarbonate	1/2 spoon	2.5	0.0025	4	0.000625
				Milk	1/2 cup	122.5	0.1225	4	0.030625
				Margarine	1/2 cup	115	0.115	4	0.02875
				Brown sugar	1 cup	220	0.22	4	0.055
				Vanilla	1 spoon	4	0.004	4	0.001
				Honey	1/3 cup	113	0.113	4	0.02825
			Low fat milk	Low fat milk	1 cup	245	0.245	1	0.245
	THURSDAY	Apple Cinnamon Bar. Low fat Milk.	Apple Cinnamon Bar.	Apples	1 unit	138	0.138	4	0.0345
				Flour	1 spoon	15	0.015	4	0.00375
				Bicarbonate	1/2 spoon	2.5	0.0025	4	0.000625
				Cinnamon	1 spoon	2	0.002	4	0.0005
				Brown sugar	1/2 cup	110	0.11	4	0.0275
				Oat	20 g	20	0.02	4	0.005
				Lard	30 g	30	0.03	4	0.0075
			Low fat milk	Low fat milk	1 cup	245	0.245	1	0.245
	FRIDAY	2 Applesauce Cookies. Canned Pineapple Chunks.	Cookies	Sugar	1 cup	200	0.2	4	0.05
				Margarine	1/2 cup	115	0.115	4	0.02875
				Eggs	1 unit	44	0.044	4	0.011
				Bicarbonate	2 spoons	10	0.01	4	0.0025
				Flour	1 cup	115	0.115	4	0.02875
				Cinnamon	1 spoon	2	0.002	4	0.0005
				Raisins	1/2 cup	72.5	0.0725	4	0.018125
				Walnuts	1/2 cup	60	0.06	4	0.015
			Applesauce	Sugar	1/2 cup	100	0.1	4	0.025
				Lemon	1 unit	58	0.058	4	0.0145
				Apples	7 cups	770	0.77	4	0.1925
			Pineapple	Pineapple	1/10 unit	254	0.254	1	0.254
	SATURDAY	yogurt Parfait	yogurt Parfait	yogurt	245 g	245	0.245	1	0.245
				Oat	1/4 cup	58.5	0.0585	1	0.0585
				Walnuts	1 spoon	7.5	0.0075	1	0.0075
				Raisins	1 spoon	9	0.009	1	0.009
	SUNDAY	Popcorn. yogurt Pop.	Popcorn	Maize	5 spoons	40	0.04	1	0.04
				Vegetal oil	1 spoon	18	0.018	1	0.018
			yogurt Pop	Yogurt	1 unit	125	0.125	1	0.125
			Fruits juice	Strawberries	500g	500	0.5	4	0.125
				Lemon	5 units	290	0.29	4	0.0725
				Sugar	1 cup	200	0.2	4	0.05
				Water	3 cups	711	0.711	4	0.17775
	LUNCH
	MONDAY	Tuna Sandwich. Cucumber Slices with Ranch Dressing. Low fat Milk.	Tuna Sandwich	Bread	2 units	56	0.056	1	0.056
				Tuna	3 ounces (1 can)	85	0.085	1	0.085
				Tomato	1 unit	150	0.15	1	0.15
				Lettuce	1 leaf	8	0.008	1	0.008
			Mayonnaise	Egg yolk	1 unit	17	0.017	2	0.0085
				Lemon	3/4 unit	43.5	0.0435	2	0.02175
				Vinegar	1 spoon	7	0.007	2	0.0035
				Rapeseed oil	3/4 cup	172.5	0.1725	2	0.08625
			Mustard	Mustard powder	1 cup	100.8	0.1008	10	0.01008
				White vinegar	2/3 cup	179.52	0.17952	10	0.017952
				Honey	1/3 cup	113	0.113	10	0.0113
			Cucumber Slices	Cucumber	164,7 g	164.7	0.1647	1	0.1647
			Ranch dressing	Buttermilk	1 cup	245	0.245	10	0.0245
				Parsley	3 spoons	30	0.03	10	0.003
				Onion	1 unit	12	0.012	10	0.0012
				Lemon	2 units	116	0.116	10	0.0116
				Garlic	1 clove	5	0.005	10	0.0005
				Pepper	1 spoon	5	0.005	10	0.0005
			Sour cream	Milk cream	2 cups	484	0.484	4	0.121
				Buttermilk	2 spoons	30.6	0.0306	4	0.00765
			Low fat milk	Low fat milk	1 cup	245	0.245	1	0.245
	TUESDAY	Peanut Butter and Jelly Sandwich. Apple. Carrot Sticks with Ranch. Low fat Milk.	Bread	Bread	2 units	56	0.056	1	0.056
			Peanut butter	Peanuts	2 cups	292	0.292	4	0.073
				Peanut oil	1 cup	145	0.145	4	0.03625
				Honey	4 spoons	40	0.04	4	0.01
				Cinnamon	4 spoon	8	0.008	4	0.002
				Chocolate chips	4 spoon	42	0.042	4	0.0105
			Grapes jelly	Grapes	125g	125	0.125	1	0.125
				Water	1/2 cup	118.5	0.1185	1	0.1185
				Sugar	75g	75	0.075	1	0.075
			Apple	Apples	1 unit	138	0.138	1	0.138
			Carrot Sticks	Carrots	55 g	55	0.055	1	0.055
			Ranch dressing	Buttermilk	1 cup	245	0.245	10	0.0245
				Parsley	3 spoons	30	0.03	10	0.003
				Onion	1 unit	12	0.012	10	0.0012
				Lemon	2 units	116	0.116	10	0.0116
				Garlic	1 clove	5	0.005	10	0.0005
				Pepper	1 spoon	5	0.005	10	0.0005
			Sour cream	Milk cream	2 cups	484	0.484	4	0.121
				Buttermilk	2 spoons	30.6	0.0306	4	0.00765
			Mayonnaise	Egg yolk	1 unit	17	0.017	6	0.00283333
				Lemon	3/4 unit	43.5	0.0435	6	0.00725
				Vinegar	1 spoon	7	0.007	6	0.00116667
				Vegetal oil	3/4 cup	172.5	0.0135	6	0.00225
			Mustard	Mustard powder	1 cup	100.8	0.1008	10	0.01008
				White vinegar	2/3 cup	179.52	0.17952	10	0.017952
				Honey	1/3 cup	113	0.113	10	0.0113
			Low fat milk	Low fat milk	1 cup	245	0.245	1	0.245
	WEDNESDAY	Green Salad with Salmon with Vinaigrette Dressing. Whole-grain Crackers. Low fat Milk.	Green Salad with Salmon	Lettuce	50 g	50	0.05	1	0.05
				Salmon	3 ounces	85	0.085	1	0.085
				Tomato	1 unit	150	0.15	1	0.15
				Cucumber	1 unit	280	0.28	1	0.28
			Vinaigrette dressing	Vegetal oil	1,5 spoons	22.5	0.0225	1	0.0225
				Vinegar	1 spoon	7	0.007	1	0.007
				Sugar	1/2 spoon	10	0.01	1	0.01
				Pepper	1/2 spoon	2.5	0.0025	1	0.0025
				Dried herbs	1/2 spoon	5	0.005	1	0.005
			Mustard	Mustard powder	1 cup	100.8	0.1008	10	0.01008
				White vinegar	2/3 cup	179.52	0.17952	10	0.017952
				Honey	1/3 cup	113	0.113	10	0.0113
			Whole-grain Crackers	Flour	3 cups	345	0.345	10	0.0345
				Oat	1 cup	70.5	0.0705	10	0.00705
				Olive oil	1 cup	230	0.23	10	0.023
				Water	1 cup	237	0.237	10	0.0237
			Low fat milk	Low fat milk	1 cup	245	0.245	1	0.245
	THURSDAY	Roast Beef Sandwich. Carrot Sticks. Apple with Peanut Butter. Water. Tea.	Roast Beef Sandwich	Bread	2 units	56	0.056	1	0.056
				Beef	2 ounces	56.7	0.0567	1	0.0567
				Tomato	1 unit	150	0.15	1	0.15
				Lettuce	3 leafs	24	0.024	1	0.024
			Mayonnaise	Egg yolk	1 unit	17	0.017	6	0.00283333
				Lemon	3/4 unit	43.5	0.0435	6	0.00725
				Vinegar	1 spoon	7	0.007	6	0.00116667
				Vegetal oil	3/4 cup	172.5	0.0135	6	0.00225
			Mustard	Mustard powder	1 cup	100.8	0.1008	10	0.01008
				White vinegar	2/3 cup	179.52	0.17952	10	0.017952
				Honey	1/3 cup	113	0.113	10	0.0113
			Carrot Sticks	Carrots	1/2 cup	55	0.055	1	0.055
			Apple	Apples	1 cup	110	0.11	1	0.11
			Peanut butter	Peanuts	2 cups	292	0.292	4	0.073
				Peanut oil	1 cup	145	0.145	4	0.03625
				Honey	4 spoons	40	0.04	4	0.01
				Cinnamon	4 spoon	8	0.008	4	0.002
				Chocolate chips	4 spoon	42	0.042	4	0.0105
			Water	Water	8 ounces	237	0.237	1	0.237
			Tea	Tea	1 unit	2	0.002	1	0.002
				Water	8 ounces	237	0.237	1	0.237
	FRIDAY	White Chili. Side Salad with Vinaigrette Dressing. Whole-wheat Bread with Tub Margarine. Low fat Milk.	White Chili	Water	8 cups	237	0.237	10	0.0237
				Kidney beans	850 g	850	0.85	8	0.10625
				Olive oil	1 spoon	15	0.015	8	0.001875
				Red pepper	2 units	298	0.298	8	0.03725
				Onion	1 unit	110	0.11	8	0.01375
				Green pepper	1 unit	45	0.045	8	0.005625
				Garlic	3 cloves	15	0.015	8	0.001875
				Green pepper powder	1 spoon	3	0.003	8	0.000375
				Cumin	1 spoon	5	0.005	8	0.000625
				Oregano	1 spoon	5	0.005	8	0.000625
				Chicken soup	2 cups	480	0.48	8	0.06
				Low fat milk	2 cups	488	0.488	8	0.061
				Coriander	1/4 cup	8	0.008	8	0.001
				Chicken	1pound	453	0.453	8	0.056625
				Maize flour	6 units	156	0.156	6	0.026
			Side Salad	Lettuce	42 g	42	0.042	1	0.042
				Carrots	27,5 g	27.5	0.0275	1	0.0275
			Vinaigrette dressing	Vegetal oil	3/4 spoon	11.25	0.01125	1	0.01125
				Vinegar	1 spoon	7	0.007	1	0.007
				Sugar	1/2 spoon	10	0.01	1	0.01
				Pepper	1/2 spoon	2.5	0.0025	1	0.0025
				Dried herbs	1/4 spoon	2.5	0.0025	1	0.0025
			Mustard	Mustard powder	1 cup	100.8	0.1008	10	0.01008
				White vinegar	2/3 cup	179.52	0.17952	10	0.017952
				Honey	1/3 cup	113	0.113	10	0.0113
			Whole-wheat Bread with Tub Margarine	Margarine	2 spoons	30	0.03	1	0.03
				Bread	2 units	56	0.056	1	0.056
			Low fat milk	Low fat milk	1 cup	245	0.245	1	0.245
	SATURDAY	Tofu Salad Sandwich. Carrot Sticks with Ranch. Apple Cinnamon Bar. Low fat Milk. .	Tofu Salad	Celery	60 g	60	0.06	4	0.015
				Onion	1/2 unit	55	0.055	4	0.01375
				Red pepper	1/2 unit	74.5	0.0745	4	0.018625
				Parsley	1 spoon	10	0.01	4	0.0025
			Mustard	Vinegar	1 cup	250	0.25	8	0.03125
				Mustard	82 g	82	0.082	8	0.01025
				Turmeric	1 spoon	10	0.01	8	0.00125
				Pepper	1 spoon	5	0.005	8	0.000625
				Ginger powder	1/2 spoon	8	0.008	8	0.001
				Cinnamon powder	1/2 spoon	4	0.004	8	0.0005
				Nutmeg powder	1/2 spoon	3.5	0.0035	8	0.0004375
			Tofu	Soya milk	2000 g	2000	2	5	0.4
				Water	1 cup	237	0.237	5	0.0474
			Mayonnaise	Egg yolk	1 unit	17	0.017	6	0.00283333
				Lemon	3/4 unit	43.5	0.0435	6	0.00725
				Vinegar	1 spoon	7	0.007	6	0.00116667
				Vegetal oil	3/4 cup	172.5	0.0135	6	0.00225
			Mustard	Mustard powder	1 cup	100.8	0.1008	10	0.01008
				White vinegar	2/3 cup	179.52	0.17952	10	0.017952
				Honey	1/3 cup	113	0.113	10	0.0113
			Sandwich	Bread	2 units	56	0.056	1	0.056
				Tomato	1 unit	150	0.15	1	0.15
				Lettuce	1 leaf	8	0.008	1	0.008
			Carrot Sticks	Carrots	55 g	55	0.055	1	0.055
			Ranch dressing	Buttermilk	1 cup	245	0.245	10	0.0245
				Parsley	3 spoons	30	0.03	10	0.003
				Onion	1 unit	12	0.012	10	0.0012
				Lemon	2 units	116	0.116	10	0.0116
				Garlic	1 clove	5	0.005	10	0.0005
				Pepper	1 spoon	5	0.005	10	0.0005
			Sour cream	Milk cream	2 cups	484	0.484	4	0.121
				Buttermilk	2 spoons	30.6	0.0306	4	0.00765
			Apple Cinnamon Bar	Apples	1 unit	138	0.138	4	0.0345
				Flour	1 spoon	15	0.015	4	0.00375
				Bicarbonate	1/2 spoon	2.5	0.0025	4	0.000625
				Cinnamon	1 spoon	2	0.002	4	0.0005
				Brown sugar	1/2 cup	110	0.11	4	0.0275
				Oat	20 g	20	0.02	4	0.005
				Lard	30 g	30	0.03	4	0.0075
			Low fat milk	Low fat milk	1 cup	245	0.245	1	0.245
	SUNDAY	Easy Red Beans and Rice with Cheddar Cheese. Side Salad with Vinaigrette Dressing. Whole-wheat Bread with Tub Margarine. Low fat Milk.	Easy Red Beans and Rice	Onion	1 unit	110	0.11	8	0.01375
				Red pepper	1 unit	149	0.149	8	0.018625
				Garlic powder	1 spoon	3	0.003	8	0.000375
				Tomatoes	29 ounces	822	0.822	8	0.10275
				Beans	600g	600	0.6	8	0.075
				Water	2 cups	474	0.474	8	0.05925
				Rice	4 cups	780	0.78	8	0.0975
			Rapeseed oil	Rapeseed oil	1 spoon	18	0.018	8	0.00225
			Cheddar Cheese	Cheddar cheese	28,25 g	28.25	0.02825	1	0.02825
			Side Salad	Lettuce	42 g	42	0.042	1	0.042
				Carrots	27,5 g	27.5	0.0275	1	0.0275
				Cucumber	1 unit	280	0.28	1	0.28
			Vinaigrette dressing	Vegetal oil	3/4 spoon	11.25	0.01125	1	0.01125
				Vinegar	1 spoon	7	0.007	1	0.007
				Sugar	1/2 spoon	10	0.01	1	0.01
				Pepper	1/2 spoon	2.5	0.0025	1	0.0025
				Dried herbs	1/4 spoon	2.5	0.0025	1	0.0025
			Mustard	Mustard powder	1 cup	100.8	0.1008	10	0.01008
				White vinegar	2/3 cup	179.52	0.17952	10	0.017952
				Honey	1/3 cup	113	0.113	10	0.0113
			Whole-wheat Bread with Tub Margarine	Bread	1 unit	28	0.028	1	0.028
				Margarine	1 spoon	15	0.015	1	0.015
			Low fat milk	Low fat milk	1 cup	245	0.245	1	0.245
	DINNER
	MONDAY	Red Hot Fusilli Pasta with Parmesan Cheese. Green Peas with Tub Margarine. White Roll with Tub Margarine. Apple Cinnamon Bar. Water. Coffee.	Red Hot Fusilli Pasta	Olive oil	5 spoons	75	0.075	4	0.01875
				Garlic	2 cloves	10	0.01	4	0.0025
				Pasta fusilli	400 g	400	0.4	4	0.1
				Parsley	4 spoons	40	0.04	4	0.01
				Tomatoes	850 g	850	0.85	4	0.2125
				Basil	1 spoon	3	0.003	4	0.00075
				Oregano	1 spoon	5	0.005	4	0.00125
				Pepper	2 spoons	10	0.01	4	0.0025
				Chicken	1pound	453	0.453	4	0.11325
			Parmesan Cheese	Parmesan cheese	3 g	3	0.003	1	0.003
			Green Peas with Tub Margarine.	green beans (frozen)	80 g	80	0.08	1	0.08
				Margarine	1 spoon	15	0.015	1	0.015
			White Roll with Tub Margarine	Bread	1 unit	57	0.057	1	0.057
				Margarine	1 spoon	15	0.015	1	0.015
			Apple Cinnamon Bar	Apples	1 unit	138	0.138	4	0.0345
				Flour	1 spoon	15	0.015	4	0.00375
				Bicarbonate	1/2 spoon	2.5	0.0025	4	0.000625
				Cinnamon	1 spoon	2	0.002	4	0.0005
				Brown sugar	1/2 cup	110	0.11	4	0.0275
				Oat	20 g	20	0.02	4	0.005
				Lard	30 g	30	0.03	4	0.0075
			Water	Water	8 ounces	237	0.237	1	0.237
			Coffee	Coffee	2,5 spoons	45	0.045	1	0.045
				Water	8 ounces	237	0.237	1	0.237
	TUESDAY	Quick Tuna Casserole. Green Beans. White Roll. Apple Cinnamon Bar. Water. Coffee.	Quick Tuna Casserole.	Water	4 cups	948	0.948	6	0.158
				Bread	1 cup	108	0.108	2	0.054
				Egg noodles	5 ounces	141.75	0.14175	2	0.070875
				Low fat milk	1/3 cup	82	0.082	2	0.041
				green beans (frozen)	184,28 g	184.28	0.18428	2	0.09214
				Tuna	1 can (6,5 ounces)	350	0.35	2	0.175
			Mushroom soup	Mushrooms	345 g	345	0.345	6	0.0575
				Flour	80 g	80	0.08	6	0.0133333
				Onion	1/2 cup	80	0.08	6	0.0133333
				Butter	1/2 cup	120	0.12	6	0.02
				Chicken soup	1,5 cups	360	0.36	6	0.06
				Milk cream	1 cup	242	0.242	6	0.0403333
				Thyme	1/8 spoon	1.25	0.00125	6	0.000208333
				Wine	1 spoon	7	0.007	6	0.00116667
				Pepper	1 spoon	5	0.005	6	0.000833333
			Green Beans	Frozen green beans	67,5 g	67.5	0.0675	1	0.0675
				Margarine	1 spoon	15	0.015	1	0.015
			White Roll	Bread	1 unit	57	0.057	1	0.057
				Margarine	2 spoons	30	0.03	1	0.03
			Apple Cinnamon Bar.	Apples	1 unit	138	0.138	4	0.0345
				Flour	1 spoon	15	0.015	4	0.00375
				Bicarbonate	1/2 spoon	2.5	0.0025	4	0.000625
				Cinnamon	1 spoon	2	0.002	4	0.0005
				Brown sugar	1/2 cup	110	0.11	4	0.0275
				Oat	20 g	20	0.02	4	0.005
				Lard	30 g	30	0.03	4	0.0075
			Coffee	Coffee	2,5 spoons	45	0.045	1	0.045
				Water	8 ounces	237	0.237	1	0.237
			Water	Water	8 ounces	237	0.237	1	0.237
	WEDNESDAY	Honey Mustard Pork Chops. Baked Potato with Tub Margarine, Green Cabbage. White Roll, Applesauce Cookies. Water.	Pork Chops	Pork chops	2 units	340	0.34	2	0.17
				Orange	1 unit	131	0.131	2	0.0655
				Soya sauce	1 spoon	16	0.016	2	0.008
			Honey Mustard	Honey	1 spoon	10	0.01	3	0.00333333
				Egg yolk	1 unit	17	0.017	3	0.00566667
				Lemon	1 unit	58	0.058	3	0.0193333
				Vinegar	1 spoon	7	0.007	3	0.00233333
				Rapeseed oil	3/4 cup	172.5	0.1725	3	0.0575
			Mustard	Mustard powder	1 cup	100.8	0.1008	10	0.01008
				White vinegar	2/3 cup	179.52	0.17952	10	0.017952
				Honey	1/3 cup	113	0.113	10	0.0113
			Baked Potato with Tub Margarine	Potatoes	1 unit	202	0.202	1	0.202
				Margarine	2 spoons	30	0.03	1	0.03
			Green Cabbage	Cabbage	35 g	35	0.035	1	0.035
				Vegetal oil	1/2 spoon	9	0.009	1	0.009
			White Roll	Bread	1 unit	57	0.057	1	0.057
				Margarine	1 spoon	15	0.015	1	0.015
			Applesauce Cookies.	Sugar	1 cup	200	0.2	4	0.05
				Margarine	1/2 cup	115	0.115	4	0.02875
				Eggs	1 unit	44	0.044	4	0.011
				Bicarbonate	2 spoons	10	0.01	4	0.0025
				Flour	1 cup	115	0.115	4	0.02875
				Cinnamon	1 spoon	2	0.002	4	0.0005
				Raisins	1/2 cup	72.5	0.0725	4	0.018125
				Walnuts	1/2 cup	60	0.06	4	0.015
			Applesauce	Sugar	1/2 cup	100	0.1	4	0.025
				Lemon	1 unit	58	0.058	4	0.0145
				Apples	7 cups	770	0.77	4	0.1925
			Water	Water	8 ounces	237	0.237	1	0.237
	THURSDAY	White Chili. Herbed Vegetables. Sweet Potato with Tub Margarine. Chocolate Pudding. Low fat Milk.	White Chili.	Water	8 cups	237	0.237	10	0.0237
				Kidney beans	850 g	850	0.85	8	0.10625
				Olive oil	1 spoon	15	0.015	8	0.001875
				Red pepper	2 units	298	0.298	8	0.03725
				Onion	1 unit	110	0.11	8	0.01375
				Green pepper	1 unit	45	0.045	8	0.005625
				Garlic	3 cloves	15	0.015	8	0.001875
				Green pepper powder	1 spoon	3	0.003	8	0.000375
				Cumin	1 spoon	5	0.005	8	0.000625
				Oregano	1 spoon	5	0.005	8	0.000625
				Chicken soup	2 cups	480	0.48	8	0.06
				Low fat milk	2 cups	488	0.488	8	0.061
				Coriander	1/4 cup	8	0.008	8	0.001
				Chicken	1pound	453	0.453	8	0.056625
				Maize flour	6 units	156	0.156	6	0.026
			Herbed Vegetables	Green beans	1 can	453.6	0.4536	6	0.0756
				Onion	1 unit	110	0.11	6	0.0183333
				Romero	1/2 spoon	5	0.005	6	0.000833333
				Margarine	1 spoon	15	0.015	6	0.0025
			Sweet Potato with Tub Margarine	Sweet potato	1 unit	146	0.146	1	0.146
				Margarine	2 spoons	30	0.03	1	0.03
			Chocolate Pudding	Sugar	1/2 cup	100	0.1	4	0.025
				Milk	2 cups	480	0.48	4	0.12
				Cacao powder	1/3 cup	30	0.03	4	0.0075
				Maize flour	3 spoons	45	0.045	4	0.01125
				Vanilla	2 spoons	8	0.008	4	0.002
			Low fat milk	Low fat milk	1 cup	245	0.245	1	0.245
	FRIDAY	Misickquatash (Indian Succotash with Ground Beef). Mashed Potatoes with Tub Margarine. Whole-wheat Bread with Tub Margarine. Low fat Milk.	Misickquatash (Indian Succotash )	Beef	1pound	453.6	0.4536	4	0.1134
				Kidney beans	600g	600	0.6	6	0.1
				Maize	1 can (15,5 ounces)	439.43	0.43943	6	0.0732383
				Tomatoes	1 can (15,5 ounces)	439.43	0.43943	6	0.0732383
				Pepper	1 spoon	5	0.005	6	0.000833333
				Nutmeg powder	1/8 spoon	0.78	0.00078	6	0.00013
			Mashed Potatoes with Tub Margarine.	Margarine	3 spoons	45	0.045	1	0.045
				Margarine	2 spoons	30	0.03	1	0.03
				Potatoes	285 g	285	0.285	1	0.285
			Whole-wheat Bread with Tub Margarine	Margarine	1 spoon	15	0.015	1	0.015
				Bread	1 unit	28	0.028	1	0.028
			Low fat milk	Low fat milk	1 cup	244	0.244	1	0.244
	SATURDAY	Easy Red Beans and Rice with Cheddar Cheese. Lemon Spinach. Orange. Low fat Milk.	Easy Red Beans and Rice	Onion	1 unit	110	0.11	8	0.01375
				Red pepper	1 unit	149	0.149	8	0.018625
				Garlic powder	1 spoon	3	0.003	8	0.000375
				Tomatoes	29 ounces	822	0.822	8	0.10275
				Beans	600 g	600	0.6	8	0.075
				Water	2 cups	474	0.474	8	0.05925
				Rice	4 cups	780	0.78	8	0.0975
				Rapeseed oil	1 spoon	18	0.018	8	0.00225
			Cheddar Cheese	Cheddar Cheese	28,25 g	28.25	0.02825	1	0.02825
			Lemon Spinach.	Spinach (frozen)	1 pound	453.6	0.4536	4	0.1134
				Pepper	1 spoon	5	0.005	4	0.00125
				Lemon	1 unit	58	0.058	4	0.0145
			Orange	Orange	1 unit	131	0.131	1	0.131
			Low fat milk	Low fat milk	1 cup	245	0.245	1	0.245
	SUNDAY	Manly Muffin Meat Loaf. Mashed Potatoes with Tub Margarine. Green Peas with Tub Margarine. Low fat Milk.	Manly Muffin Meat Loaf.	Eggs	1 unit	44	0.044	3	0.0146667
				Low fat milk	1/2 cup	61.25	0.06125	3	0.0204167
				Oat	3/4 cup	175.5	0.1755	3	0.0585
				Beef	1 pound	453.6	0.4536	3	0.1512
				Onion	30 g	30	0.03	3	0.01
				Cheese	5,5 g	56.5	0.0565	3	0.0188333
			Mashed Potatoes with Tub Margarine.	Low fat milk	3 spoons	45	0.045	1	0.045
				Margarine	2 spoons	30	0.03	1	0.03
				Potatoes	285 g	285	0.285	1	0.285
			Green Peas with Tub Margarine	Green beans (frozen)	80 g	80	0.08	1	0.08
				Margarine	1 spoon	15	0.015	1	0.015
			Low fat milk	Low fat milk	1 cup	245	0.245	1	0.245
